# Supplementary material for: Inter- and intraspecific variation in the Artibeus species complex demonstrates size and shape partitioning among species
Source: PeerJ journal article supplement (doi:10.7717/peerj.11777), 2021-07-12

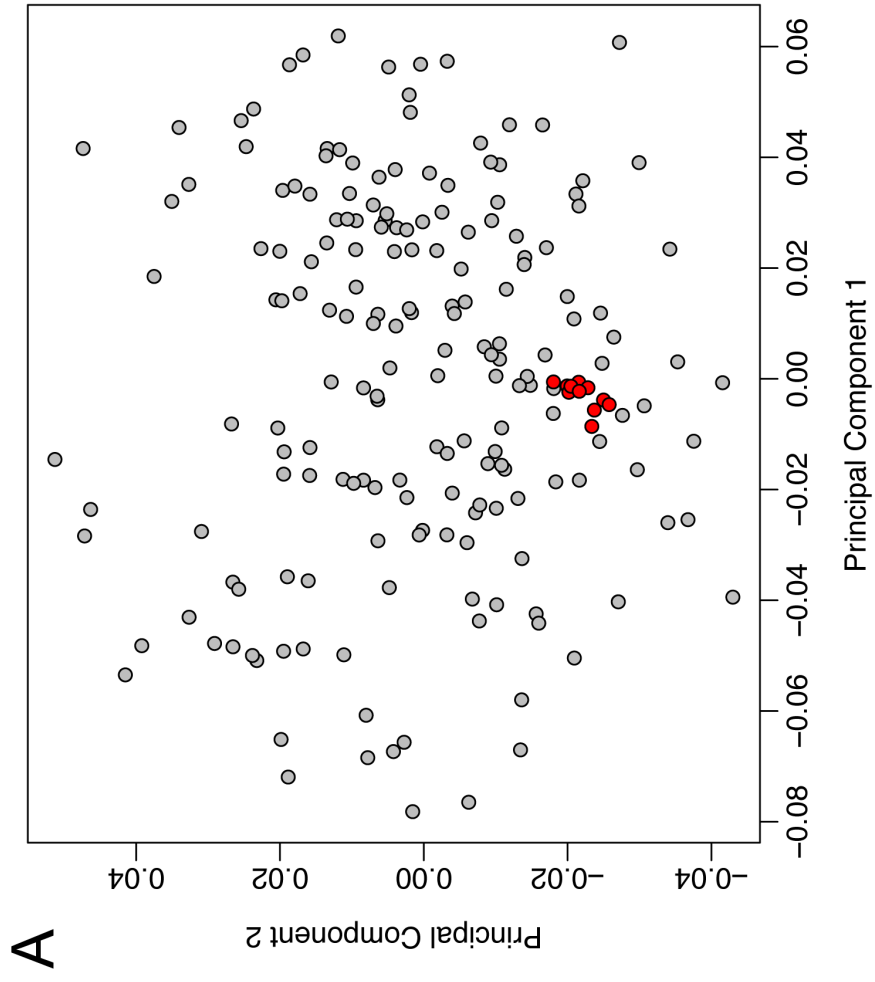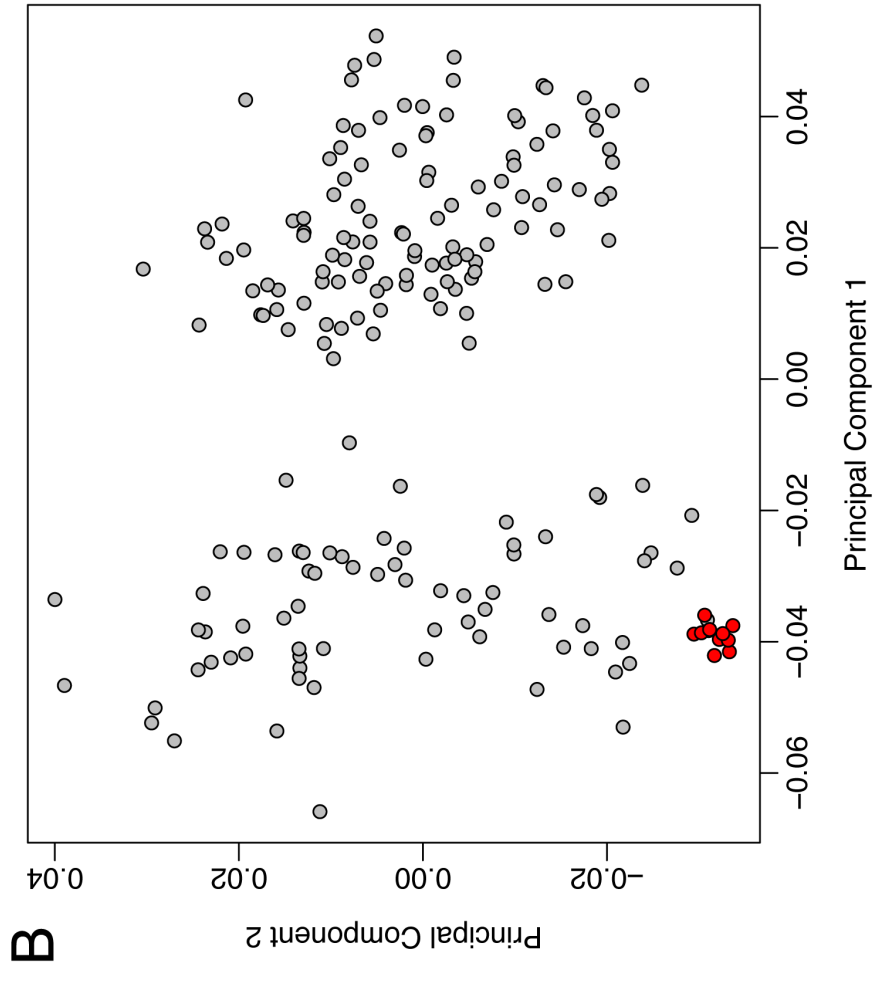

Supplement: FigS1-ErrorFigureFlat.pdf [file FigS1-ErrorFigureFlat.pdf]
