# Supplementary material for: Inter- and intraspecific variation in the Artibeus species complex demonstrates size and shape partitioning among species
Source: PeerJ journal article supplement (doi:10.7717/peerj.11777), 2021-07-12
Supplement: FigS4-VentOverlap.pdf [file FigS4-VentOverlap.pdf]

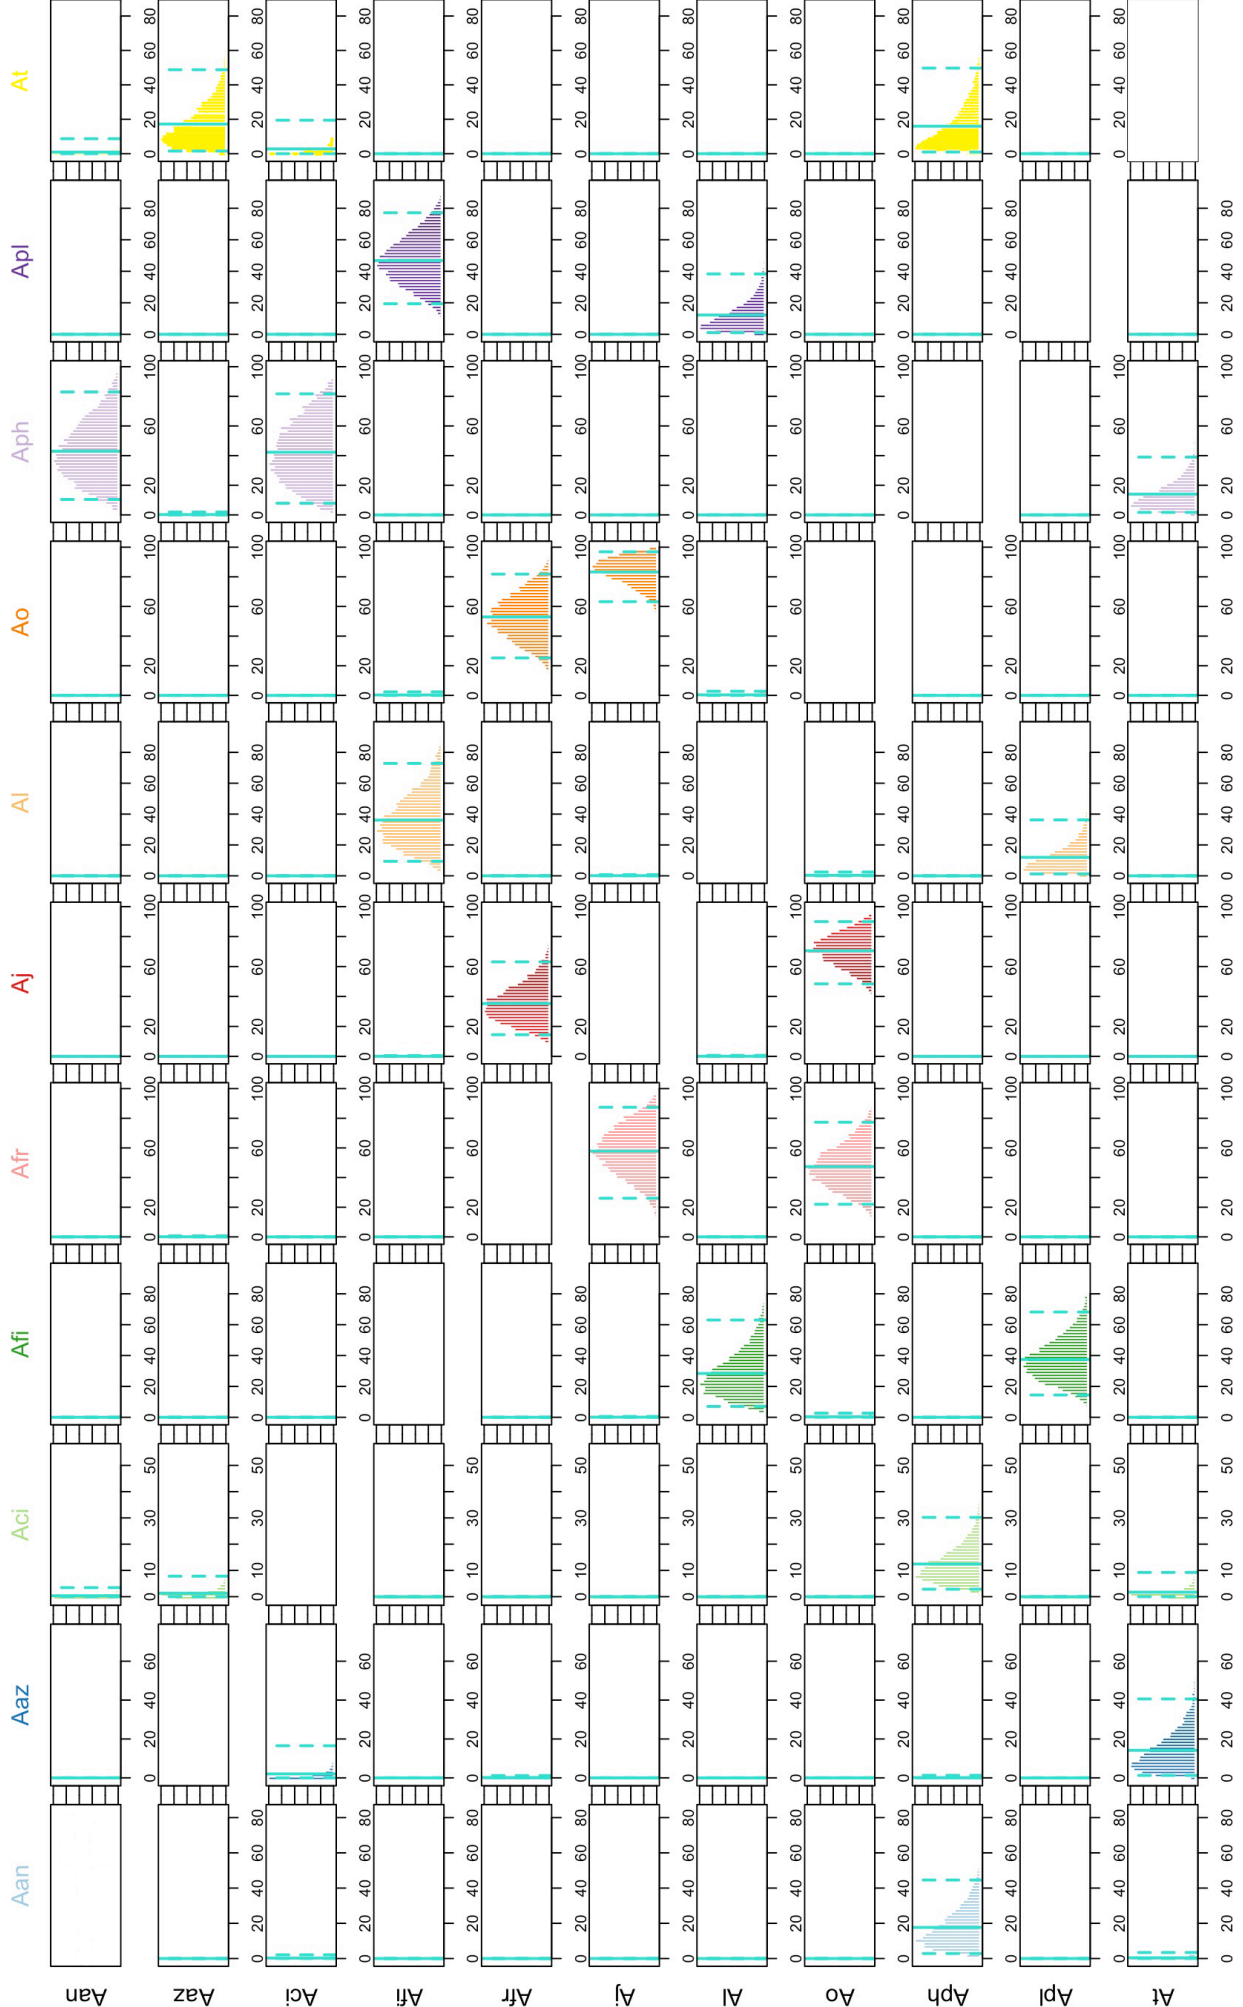

Overlap Probability (%) -- Niche Region Size: 95%
