# Supplementary material for: Inter- and intraspecific variation in the Artibeus species complex demonstrates size and shape partitioning among species
Source: PeerJ. 2021 Jul 12;9:e11777. doi: 10.7717/peerj.11777 (PMC8280882; doi:10.7717/peerj.11777)
Supplement: Supplemental Information 6 — Table S1: Landmark definitions. Landmark number, type (according to Bookstein’s topology of landmarks), and a description of the landmark in anatomical terms. Table S2: Interspecific data including taxon name, specimen number, locality, sex, principal component scores for PC1–4 in lateral and ventral views, centroid sizes in lateral and ventral views, and common allometric coefficient scores in lateral and ventral views. Table S3: Interspecific statistical analyses. Results for lateral and ventral view Procrustes ANOVAs of shape and size; shape, species, sex, and size; and size, species, and sex. Tests of phylogenetic signal in lateral and ventral view for shape and size. Table S4: Interspecific data for species means used in phylogenetic signal analyses including species names, centroid sizes, and PC1–4 scores for lateral and ventral view. Table S5: Intraspecific data for A. lituratus including specimen number, locality, sex, country of origin, principal component scores for PC1–4 in lateral and ventral views, and centroid sizes in lateral and ventral views. Table S6: Intraspecific statistical analyses for A. lituratus. Results for lateral and ventral view Procrustes ANOVAs of shape, sex, size, and country with pairwise comparisons. Distance matrices for country means, and the cophenetic coefficients for lateral and ventral datasets are also included. [file peerj-09-11777-s006.xlsx]

## Sheet: Table S1-Landmark Definitions
Landmark number, type (according to Bookstein’s topology of landmarks), and a description of the landmark in anatomical terms.
Artibeus spp.	Lateral
Landmark Number	Type	Description
1	II	Rostral tip of rostrum
2	II	Rostral canine along maxillary border with tooth
3	II	Caudal canine along maxillary border with tooth
4	II	Caudal border of last molar
5	II	Caudal border of nares
6	II	Rostral border of orbit
7	II	Caudal border of zygomatic arch
8	II	Rostral border of external acoustic meatus
9	II	Caudal border of external acoustic meatus
10	II	External occipital protuberance
11	II	Ventral extent of occipital condyle
SL-1	SL	Dorsal aspect of cranium
Artibeus spp.	Ventral
Landmark Number	Type	Description
1	II	Tip of rostrum between medial incisors
2	II	Lateral side of lateral incisor at base of tooth
3	II	Caudal aspect of canine at base of tooth
4	II	Rostral aspect of beginning of zygomatic arch
5	II	Caudal aspect of rostral zygomatic arch at apex of curve
6	II	Caudal aspect of molar tooth row at base of last molar
7	II	Internal angle of palate
8	II	Caudal border of palate at midline
9	II	Lateral aspect of jaw articulation
10	II	Medial aspect of jaw articulation
11	II	Caudal border of end of zygomatic arch
12	II	Ventral aspect of foramen magnum on midline
13	II	Dorsal aspect of foramen magnum on midline
14	II	Caudalmost aspect of skull
15	II	Lateral aspect of occiptal condyle
16	II	Medial aspect of cochlear region
17	II	Tip of parocciptal process
SL-1	SL	External aspect of zygomatic arch

## Sheet: Table S2-Artibeus
Interspecific data including taxon name, specimen number, locality, sex, principal component scores for PC1–4 in lateral and ventral views, centroid sizes in lateral and ventral views, and common allometric coefficient scores in lateral and ventral views.
	Taxon	PhylogenyName	Number	Locality	Sex	Abbreviation	CSizeLat	PC1Lat	PC2Lat	PC3Lat	PC4Lat	CSizeVent	PC1Vent	PC2Vent	PC3Vent	PC4Vent	LatCAC	VentCAC
1	Artibeus_aztecus	'Artibeusaztecus'	LSUMZ 14743	Guatemala, Alto Verapaz San Cristobal	M	Aaz	4.10382	-0.0424285	0.0168663	-0.000436577	-0.00995522	3.33082	-0.0443547	0.0046428	0.0108155	-0.00323457	-0.0408618	-0.0439226
2	Artibeus_aztecus	'Artibeusaztecus'	LSUMZ 14744	Guatemala, Alto Verapaz San Cristobal	M	Aaz	3.94797	-0.0437261	0.00898228	-0.00309379	0.00424398	3.18123	-0.0397682	0.00499442	0.00905128	-0.00138627	-0.0421812	-0.0396074
3	Artibeus_aztecus	'Artibeusaztecus'	LSUMZ 14745	Guatemala, Alto Verapaz San Cristobal	M	Aaz	3.8855	-0.0502695	0.0215935	0.010568	-0.0127393	3.14782	-0.0479657	0.0189684	-0.00608095	0.00295428	-0.0492599	-0.0477539
4	Artibeus_aztecus	'Artibeusaztecus'	LSUMZ 14746	Guatemala, Alto Verapaz San Cristobal	F	Aaz	3.86663	-0.0391565	0.0441093	0.00285616	-0.0165726	3.12678	-0.0408966	0.0204938	0.00394718	0.0136107	-0.0358661	-0.0407844
5	Artibeus_aztecus	'Artibeusaztecus'	LSUMZ 2788	Mexico, SLP, Cerro Camanero	M	Aaz	4.11055	-0.0409116	0.0117526	-0.0076282	-0.00660828	3.22253	-0.0335451	0.00276221	0.0118814	0.0180653	-0.0385642	-0.0337993
6	Artibeus_cinereus	'Artibeuscinereus'	LSUMZ 7149	Honduras, Orange Walk	M	Aci	3.59103	-0.000806592	-0.0119871	0.0113699	0.00514441	2.89003	-0.0360675	0.0365764	0.00566804	0.00712572	-0.0036266	-0.0359462
7	Artibeus_cinereus	'Artibeuscinereus'	LSUMZ 22714	Bolivia, Dpto La Paz Serrania Bellavista	F	Aci	3.61306	-0.0401069	0.0266493	0.010345	-0.0163122	2.96332	-0.0526826	0.0264419	0.0146726	0.000636174	-0.0400004	-0.0522079
8	Artibeus_cinereus	'Artibeuscinereus'	LSUMZ 9802	Costa Rica, Alajuela, Santa Clara	M	Aci	3.6979	-0.0153982	0.00997497	0.012345	0.0106821	3.02573	-0.0449875	0.0292128	-0.00417269	0.00133808	-0.0159969	-0.0445442
9	Artibeus_cinereus	'Artibeuscinereus'	LSUMZ 12861	Costa Rica, Cartago, Pacuare	F	Aci	3.65459	-0.0402289	0.0277799	0.00182627	-0.0162542	2.95273	-0.0382981	0.0258648	-0.00940013	0.000200019	-0.0384108	-0.037859
10	Artibeus_cinereus	'Artibeuscinereus'	LSUMZ 12860	Costa Rica, Cartago, Pacuare	M	Aci	3.66087	-0.0282211	0.00343685	0.0191517	-0.00364853	2.93209	-0.0405527	0.0305262	-0.00601384	0.00249212	-0.0306418	-0.0401908
11	Artibeus_andersoni	'Artibeusanderseni'	LSUMZ 28436	Peru, dpta Loreto, Rio Amazonas	M	Aan	3.23997	-0.0686962	-0.00525744	0.000435359	0.0149489	2.53813	-0.0594536	-0.0183436	-0.00202299	-0.000270853	-0.0673859	-0.0597366
12	Artibeus_andersoni	'Artibeusanderseni'	LSUMZ 12200	Peru, Loreto, Yarinacocha	M	Aan	3.30982	-0.06571	-0.000541842	0.0139384	0.0141359	2.60933	-0.0399847	-0.00681045	-0.0119555	0.00106627	-0.0652811	-0.040553
13	Artibeus_andersoni	'Artibeusanderseni'	LSUMZ 14255	Peru, Loreto, Yarinacocha	M	Aan	3.20927	-0.0499937	-0.00933396	-0.0037162	-0.000884763	2.59833	-0.0427697	-0.0155881	-0.00586966	-0.0021248	-0.0494758	-0.0430954
14	Artibeus_andersoni	'Artibeusanderseni'	LSUMZ 21544	Peru, Amazonas	M	Aan	3.28782	-0.0609189	-0.00634836	0.0166331	-0.00213539	2.68196	-0.0471533	-0.00489327	-0.0128331	-0.00914913	-0.0619921	-0.0469543
15	Artibeus_andersoni	'Artibeusanderseni'	LSUMZ 21533	Peru, Amazonas	M	Aan	3.27819	-0.0765248	0.00814501	0.0225036	0.0205354	2.66828	-0.045636	-0.00318229	-0.0134998	-0.0120148	-0.0762244	-0.0455219
16	Artibeus_andersoni	'Artibeusanderseni'	LSUMZ 21531	Peru, Amazonas	F	Aan	3.30375	-0.0782816	0.000179941	0.00336968	-0.000522891	2.66443	-0.068117	-0.00542533	0.00188663	0.000119447	-0.0771788	-0.067879
17	Artibeus_andersoni	'Artibeusanderseni'	LSUMZ 21530	Peru, Amazonas	M	Aan	3.34693	-0.0674317	-0.00192016	0.00666406	0.00780492	2.74109	-0.0460995	-0.0145183	-0.00281906	-0.00363727	-0.0664137	-0.0461913
18	Artibeus_andersoni	'Artibeusanderseni'	LSUMZ 22336	Ecuador, Napo, Limoncocha	F	Aan	3.29676	-0.0511293	-0.021951	-0.0043179	-0.00273523	2.62295	-0.0569389	-0.00687967	-0.0093145	-0.00312038	-0.0521089	-0.0566178
19	Artibeus_aztecus	'Artibeusaztecus'	LSUMZ 12870	Costa Rica, San Jose, Fila la Maquina	M	Aaz	4.16492	-0.0670014	0.016023	-0.00111253	0.00934244	3.30635	-0.0294767	-0.00668171	0.00230663	0.00964667	-0.0632475	-0.0292962
20	Artibeus_aztecus	'Artibeusaztecus'	LSUMZ 12874	Costa Rica, San Jose, Fila la Maquina	F	Aaz	4.27444	-0.0579596	0.0158509	-0.0130496	-0.00558945	3.43737	-0.0325206	-0.00403601	-0.0228722	-0.000434714	-0.0538303	-0.0324742
21	Artibeus_aztecus	'Artibeusaztecus'	LSUMZ 12879	Costa Rica, San Jose, Fila la Maquina	F	Aaz	4.2783	-0.0325627	0.0155332	0.00217125	-0.000990788	3.44575	-0.0124416	-0.00415988	-0.00309955	-0.00455294	-0.0304036	-0.0127844
22	Artibeus_aztecus	'Artibeusaztecus'	LSUMZ 12875	Costa Rica, San Jose, Fila la Maquina	F	Aaz	4.27632	-0.0274481	0.000212099	0.0131144	-0.0251444	3.46221	-0.0322925	0.00269896	-0.0182435	-0.000306013	-0.0288664	-0.0320077
23	Artibeus_cinereus	'Artibeuscinereus'	LSUMZ 9411	Costa Rica, Cartiago, Turialba	F	Aci	3.60252	-0.0162352	0.030238	0.0134645	-0.00290571	2.88547	-0.0159359	0.0274063	0.00486639	-0.0056541	-0.0153146	-0.0158661
24	Artibeus_cinereus	'Artibeuscinereus'	LSUMZ 9412	Costa Rica, Cartiago, Turialba	M	Aci	3.58198	-0.0398012	0.00748973	-0.00451999	-0.00207854	2.88008	-0.0385953	0.0121412	-0.0003594	-0.00799122	-0.0389086	-0.0386975
25	Artibeus_cinereus	'Artibeuscinereus'	LSUMZ 9413	Costa Rica, Cartiago, Turialba	F	Aci	3.52241	0.0110229	-0.0102644	0.000520134	-0.00257122	2.81957	-0.0248547	0.0185403	-0.00485269	0.00424645	0.00879941	-0.0247397
26	Artibeus_cinereus	'Artibeuscinereus'	LSUMZ 9414	Costa Rica, Cartiago, Turialba	M	Aci	3.56862	-0.0112996	0.00629679	-0.00286214	-0.0194119	2.82414	-0.0263479	0.0296687	-0.000446825	0.0148037	-0.0112594	-0.0260225
27	Artibeus_cinereus	'Artibeuscinereus'	LSUMZ 9955	Costa Rica, Puntarenas, Julieta	F	Aci	3.5101	-0.044041	0.0166068	-0.00182365	-0.0137448	2.84657	-0.0402329	0.00951163	0.00300129	0.00703245	-0.0424639	-0.039987
28	Artibeus_cinereus	'Artibeuscinereus'	LSUMZ 9441	Costa Rica, Kimon, Inuis.inda vista	M	Aci	3.50334	-0.0164162	0.0122753	0.0123576	0.00182527	2.87915	-0.0232423	0.014835	0.0036173	-0.00265814	-0.0168063	-0.023483
29	Artibeus_cinereus	'Artibeuscinereus'	LSUMZ 9419	Costa Rica, Cartiago, Turialba	F	Aci	3.57857	-0.0253595	0.0379589	0.00679441	0.014219	2.89286	-0.0282914	0.0324572	0.00423018	-1.08788e-05	-0.0229967	-0.0281177
30	Artibeus_cinereus	'Artibeuscinereus'	LSUMZ 9944	Costa Rica, Heredia, Puerto Vieja	F	Aci	3.61516	-0.0216766	0.0147615	0.00926881	0.0173152	2.90997	-0.0187037	0.0262092	-0.00866808	0.00104139	-0.0208995	-0.0185716
31	Artibeus_cinereus	'Artibeuscinereus'	LSUMZ 9417	Costa Rica, Cartiago, Turialba	F	Aci	3.5702	0.00322538	0.0351567	0.0235248	-0.0112152	2.91757	-0.0273009	0.0278869	0.00218707	0.00119138	0.00250466	-0.0271226
32	Artibeus_cinereus	'Artibeuscinereus'	LSUMZ 11461	Costa Rica, Puntarenas, Palmar Sur	M	Aci	3.39537	-0.0257811	0.0347302	0.00930192	-0.000585889	2.79154	-0.0414057	0.0221474	-0.00592474	-0.00744944	-0.0236918	-0.0408252
33	Artibeus_cinereus	'Artibeuscinereus'	LSUMZ 9956	Costa Rica, Puntarenas, Julieta	M	Aci	3.55492	-0.018398	-0.00270872	0.0156317	0.000994544	2.8999	-0.0365794	0.0136779	-0.00611338	0.000458973	-0.0207943	-0.0366132
34	Artibeus_cinereus	'Artibeuscinereus'	LSUMZ 9422	Costa Rica, Puntarenas, Rincon de Osa	F	Aci	3.68433	0.0119828	0.0250514	0.0107256	-0.000897968	3.01364	-0.020069	0.0329532	-0.00240669	0.000547383	0.0117836	-0.0197376
35	Artibeus_cinereus	'Artibeuscinereus'	LSUMZ 9423	Costa Rica, Puntarenas, Rincon de Osa	F	Aci	3.54959	-0.0111858	0.0387517	0.00685595	0.000831066	2.90244	-0.0177043	0.0223602	-0.0127626	0.0117103	-0.00897557	-0.0178177
36	Artibeus_cinereus	'Artibeuscinereus'	LSUMZ 9425	Costa Rica, Puntarenas, Rincon de Osa	F	Aci	3.49844	-0.00378214	0.0247797	0.0091124	-0.0047561	2.81649	-0.036524	0.030399	0.00860585	0.0145754	-0.00380791	-0.0362297
37	Artibeus_cinereus	'Artibeuscinereus'	LSUMZ 9424	Costa Rica, Puntarenas, Rincon de Osa	M	Aci	3.49671	-0.0186183	0.0197605	0.0113065	0.0141456	2.80932	-0.0358554	0.0144597	0.00320296	0.0142502	-0.0180679	-0.0355252
38	Artibeus_fimbriatus	'Artibeusfimbriatus'	LSUMZ 37352	Argentina, Misiones, Parque Nacional Iguazu	F	Afi	5.85494	0.028569	0.0100381	0.0130088	0.000670276	4.73983	0.0374437	0.0133402	-0.00566991	-0.0130818	0.0276851	0.0375682
39	Artibeus_fimbriatus	'Artibeusfimbriatus'	LSUMZ 37350	Argentina, Misiones, Parque Nacional Iguazu	M	Afi	5.66028	0.0333882	0.0218876	0.0047643	0.000531382	4.53982	0.0289065	0.0127889	-0.00084271	0.00663582	0.0342984	0.0289513
40	Artibeus_fimbriatus	'Artibeusfimbriatus'	LSUMZ 37351	Argentina, Misiones, Parque Nacional Iguazu	F	Afi	5.68129	0.045786	0.0176063	0.0201397	0.0141366	4.6165	0.0443516	0.0243218	-0.00212577	-0.00834591	0.0446532	0.0445905
41	Artibeus_fimbriatus	'Artibeusfimbriatus'	LSUMZ 37339	Paraguay, Itapua, Alto Vera, Parque Nacional San Rafael	F	Afi	5.67275	0.0362901	-0.00490706	-0.000763891	0.00483936	4.57965	0.0436656	0.0110874	-0.00277239	0.0098518	0.0356677	0.0435667
42	Artibeus_fimbriatus	'Artibeusfimbriatus'	LSUMZ 37340	Paraguay, Itapua, Alto Vera, Parque Nacional San Rafael	F	Afi	5.68571	0.0560652	-0.00408808	0.0194231	0.00612189	4.59989	0.0393629	0.0196352	-0.0217923	0.014489	0.0528713	0.0389437
43	Artibeus_fimbriatus	'Artibeusfimbriatus'	LSUMZ 37347	Paraguay, Alto Parana, Presidente Franco, Reserva Maharishi	F	Afi	5.79348	0.0281426	-0.00683724	-0.00169241	0.0184709	4.59735	0.030199	-0.00978583	-0.00724189	0.017303	0.0284516	0.030192
44	Artibeus_fimbriatus	'Artibeusfimbriatus'	LSUMZ 37349	Paraguay, Alto Parana, Presidente Franco, Reserva Maharishi	F	Afi	5.56596	0.0311244	0.0221227	0.00412149	-0.0166347	4.51832	0.0226105	0.00298025	-0.0203853	0.00623951	0.0317273	0.0221702
45	Artibeus_fimbriatus	'Artibeusfimbriatus'	LSUMZ 37335	Paraguay, Canindeyu, Salto del Guaira, Refugio Biologico Carapa	F	Afi	5.77786	0.0318187	0.0116487	0.00109395	0.00887777	4.70148	0.0347073	0.0124852	-0.01533	0.00785422	0.0325243	0.0347672
46	Artibeus_fimbriatus	'Artibeusfimbriatus'	LSUMZ 37336	Paraguay, Canindeyu, Salto del Guaira, Refugio Biologico Carapa	M	Afi	5.64199	0.0565632	0.000231286	0.0177991	0.00196289	4.61883	0.0406803	0.0186971	-0.00505212	0.00832515	0.0537807	0.0405821
47	Artibeus_fimbriatus	'Artibeusfimbriatus'	LSUMZ 37337	Paraguay, Canindeyu, Salto del Guaira, Refugio Biologico Carapa	F	Afi	5.82197	0.0369698	0.00141289	0.00318737	0.00149558	4.73299	0.0368191	0.0130477	0.00893201	-0.00652693	0.0359903	0.0368163
48	Artibeus_fimbriatus	'Artibeusfimbriatus'	LSUMZ 37338	Paraguay, Canindeyu, Salto del Guaira, Refugio Biologico Carapa	F	Afi	5.65693	0.0386428	0.0110621	0.0177177	-0.00496007	4.70153	0.0373774	0.0160547	0.0208784	0.00343254	0.0370074	0.0374575
49	Artibeus_fimbriatus	'Artibeusfimbriatus'	LSUMZ 37343	Paraguay, Canindeyu, Villa Ygatimi, Reserva Natural del Bosque Mbaracayu	F	Afi	5.85116	0.045871	0.0122906	0.00757735	-0.000892718	4.70593	0.043055	0.0129605	0.00734523	-6.61971e-06	0.0453181	0.0430386
50	Artibeus_fimbriatus	'Artibeusfimbriatus'	LSUMZ 37344	Paraguay, Canindeyu, Villa Ygatimi, Reserva Natural del Bosque Mbaracayu	M	Afi	5.5986	0.0357109	0.0231092	0.00630932	0.000212327	4.55022	0.0326913	0.00968424	-0.00924171	-0.000663933	0.036566	0.0327543
51	Artibeus_fimbriatus	'Artibeusfimbriatus'	LSUMZ 37345	Paraguay, Canindeyu, Villa Ygatimi, Reserva Natural del Bosque Mbaracayu	F	Afi	5.6819	0.039016	0.0306656	0.013594	0.00387735	4.6114	0.0324791	0.0231081	-0.0157363	-0.00191051	0.0394661	0.0324988
52	Artibeus_fimbriatus	'Artibeusfimbriatus'	LSUMZ 37346	Paraguay, Canindeyu, Villa Ygatimi, Reserva Natural del Bosque Mbaracayu	M	Afi	5.36811	0.0235189	0.035283	-0.0158105	-0.0175051	4.27672	0.0348689	0.0175804	0.017615	0.00104509	0.0275769	0.0348091
53	Artibeus_fraterculus	'Artibeusfraterculus'	LSUMZ 22081	Peru, Ancash	M	Afr	4.95092	0.0147998	0.0216434	-0.00383088	0.00151244	3.96123	0.0301525	-0.00502192	0.0027251	0.0226764	0.0175272	0.0297588
54	Artibeus_fraterculus	'Artibeusfraterculus'	LSUMZ 18453	Peru, Amazonas, Balsas	F	Afr	5.05074	0.0139514	-0.0191747	-0.00696618	0.0112567	3.96832	0.0159973	-0.0122166	0.000479746	0.0189712	0.0130639	0.0159325
55	Artibeus_fraterculus	'Artibeusfraterculus'	LSUMZ 18452	Peru, Amazonas, Balsas	F	Afr	4.85557	-0.0155608	0.0123921	-0.0136791	-0.00308029	3.94073	0.0210068	-0.0169304	0.0181025	0.000691415	-0.0120533	0.0209583
56	Artibeus_fraterculus	'Artibeusfraterculus'	LSUMZ 18451	Peru, Amazonas, Balsas	F	Afr	5.03324	0.0114811	-0.00595556	0.00270332	-0.00871245	4.04645	0.00481045	-0.006532	0.00610624	-0.00747741	0.010145	0.00481143
57	Artibeus_fraterculus	'Artibeusfraterculus'	LSUMZ 21223	Peru, Lambayeque	M	Afr	5.13466	-0.0134281	-0.0177696	-0.0169127	-0.00583938	4.01631	0.000369473	-0.00854393	-0.00491121	0.0142386	-0.012579	0.000346571
58	Artibeus_fraterculus	'Artibeusfraterculus'	LSUMZ 21225	Peru, Lambayeque	F	Afr	5.0013	-0.0124306	0.00315983	-0.00596421	-0.00333771	4.02919	0.00732747	-0.0163733	0.00779857	0.00296686	-0.011232	0.00698719
59	Artibeus_fraterculus	'Artibeusfraterculus'	LSUMZ 21227	Peru, Lambayeque	F	Afr	4.82044	0.00424462	0.0186557	0.00239388	0.0115476	3.96023	0.00689451	-0.00808633	0.00701503	0.0084929	0.00623516	0.00640227
60	Artibeus_fraterculus	'Artibeusfraterculus'	LSUMZ 21228	Peru, Lambayeque	F	Afr	4.78674	0.0196649	0.006383	0.00522156	0.00921988	3.94978	0.0160055	-0.0197028	0.00306819	-0.00402482	0.0196279	0.0155251
61	Artibeus_fraterculus	'Artibeusfraterculus'	LSUMZ 21215	Peru, Lambayeque	M	Afr	4.95046	0.00181378	-0.00319926	-0.00071302	0.00201003	3.93397	0.0170522	-0.0259592	0.00369341	0.0139955	0.00221815	0.0164687
62	Artibeus_fraterculus	'Artibeusfraterculus'	LSUMZ 21216	Peru, Lambayeque	F	Afr	4.84387	-0.00180373	-0.00631441	-0.00690058	0.0202479	3.88658	0.0197918	-0.0169197	0.0106404	0.00709668	-0.000488332	0.0193999
63	Artibeus_fraterculus	'Artibeusfraterculus'	LSUMZ 27236	Peru, Lambayeque, Cerro la Vieja	M	Afr	4.83197	0.000461049	0.0120652	-0.0182621	0.000300609	3.92922	0.0278483	-0.0113395	0.0145478	-0.00176596	0.00432836	0.0275677
64	Artibeus_fraterculus	'Artibeusfraterculus'	LSUMZ 27235	Peru, Lambayeque, Las Junitas	M	Afr	4.7257	-0.0241849	0.0101414	-0.0220776	0.0176111	3.82708	0.0199544	-0.0236537	-0.00463088	0.0148284	-0.0189654	0.0192111
65	Artibeus_fraterculus	'Artibeusfraterculus'	LSUMZ 27234	Peru, Lambayeque, Las Junitas	F	Afr	5.02261	-0.00115965	0.0161017	-0.0169197	-0.00145217	4.03081	0.00623841	-0.0158059	-0.00331038	-0.00341859	0.00195797	0.00575793
66	Artibeus_fraterculus	'Artibeusfraterculus'	LSUMZ 27233	Peru, Lambayeque, Las Junitas	M	Afr	4.67525	-0.0295213	0.00849491	-0.0184217	0.00912512	3.81798	0.0106933	-0.0186963	0.00579911	0.014919	-0.025022	0.01016
67	Artibeus_fraterculus	'Artibeusfraterculus'	LSUMZ 27238	Peru, Lambayeque, Cerro la Vieja	M	Afr	4.8514	-0.00176514	0.0202006	-0.00391555	0.013681	3.99221	0.0189208	-0.0142428	0.00615558	0.00046569	0.00154778	0.0185808
68	Artibeus_fraterculus	'Artibeusfraterculus'	LSUMZ 27239	Peru, Lambayeque, Cerro la Vieja	M	Afr	4.62655	-0.00881791	0.0121784	-0.0108219	-0.00465583	3.83027	0.00632154	-0.0162255	-0.0131044	0.00873059	-0.00607313	0.00598194
69	Artibeus_fraterculus	'Artibeusfraterculus'	LSUMZ 21590	Peru, Lambayeque	F	Afr	4.75629	-0.00389638	-0.00503853	-0.00977262	-0.00144392	3.85367	0.012333	-0.0314542	6.65506e-05	0.00780322	-0.00269015	0.0119613
70	Artibeus_fraterculus	'Artibeusfraterculus'	LSUMZ 21242	Peru, Lambayeque	M	Afr	4.63538	0.00034947	0.0159829	-0.00179671	0.000873679	3.78658	0.0186077	-0.0101108	0.00153343	0.0120307	0.0025025	0.0181928
71	Artibeus_fraterculus	'Artibeusfraterculus'	LSUMZ 21591	Peru, Lambayeque	F	Afr	4.69078	-0.0234248	0.0123599	-0.00536029	0.00881152	3.83143	0.00284796	-0.0119111	0.00903791	0.00759965	-0.0202562	0.00246266
72	Artibeus_fraterculus	'Artibeusfraterculus'	LSUMZ 21240	Peru, Lambayeque	M	Afr	4.62226	-0.0183076	0.024077	-0.0163911	0.00779183	3.70388	0.0115829	-0.0215737	0.00516106	0.026948	-0.0130912	0.0109017
73	Artibeus_jamaicensis	'Artibeusjamaicensis'	LSUMZ 25184	Costa Rica, San Jose	F	Aj	5.14562	0.00351256	0.011493	-0.00601658	-0.0183087	4.14477	0.0204093	-0.0041228	-0.00833507	0.00646507	0.00513995	0.0202014
74	Artibeus_jamaicensis	'Artibeusjamaicensis'	LSUMZ 3925	Mexico, SLP	F	Aj	5.10778	0.0164449	-0.00848314	-0.0118042	-0.00396818	4.05518	0.015968	0.0010116	0.0157602	-0.000340627	0.0163281	0.0160287
75	Artibeus_jamaicensis	'Artibeusjamaicensis'	LSUMZ 3926	Mexico, SLP	M	Aj	4.97549	-0.00922908	-0.0185925	-0.00181043	0.0141121	3.95792	0.0101798	-0.0204003	-0.00577621	0.0216683	-0.00990609	0.00972248
76	Artibeus_jamaicensis	'Artibeusjamaicensis'	LSUMZ 3927	Mexico, SLP	M	Aj	5.01835	0.0284469	-0.00552428	-0.00297908	-0.020809	3.96169	0.00910143	-0.000532197	0.0219204	0.0168881	0.0268384	0.00909956
77	Artibeus_jamaicensis	'Artibeusjamaicensis'	LSUMZ 3928	Mexico, SLP	F	Aj	5.01886	-0.00125489	0.0150768	-0.0162017	0.0012682	4.03264	0.0119203	-0.00892872	-0.0220931	0.0034227	0.00189762	0.0117836
78	Artibeus_jamaicensis	'Artibeusjamaicensis'	LSUMZ 4845	Mexico, SLP, El Salto	F	Aj	5.05462	0.00574879	0.00924308	-0.00648571	-0.00918469	4.17694	0.00379533	0.00668045	0.00671867	-0.00598873	0.00676063	0.00418353
79	Artibeus_jamaicensis	'Artibeusjamaicensis'	LSUMZ 4846	Mexico, SLP, El Salto	M	Aj	5.19503	-0.0227411	0.00949446	-0.0340427	-0.00299505	4.09084	0.00392932	-0.0206942	-0.0116093	-0.0044023	-0.0177675	0.00385351
80	Artibeus_jamaicensis	'Artibeusjamaicensis'	LSUMZ 4847	Mexico, SLP, El Salto	M	Aj	5.08972	-0.0132014	0.0119321	-0.0052794	0.0156301	4.09405	0.00813747	-0.00292557	-0.00466674	-0.00640461	-0.0106664	0.00800999
81	Artibeus_jamaicensis	'Artibeusjamaicensis'	LSUMZ 4848	Mexico, SLP, El Salto	M	Aj	5.04479	-0.00650903	0.0287957	0.00224399	-0.0034228	4.15854	0.00904595	0.00146358	0.00872583	-0.00433263	-0.0039923	0.00936285
82	Artibeus_jamaicensis	'Artibeusjamaicensis'	LSUMZ 4850	Mexico, SLP, El Salto	M	Aj	5.00382	0.00932298	-0.00277466	-0.00536878	0.000738506	4.03032	0.0187286	-0.0221247	-0.0117383	-0.00765601	0.00961891	0.0186559
83	Artibeus_jamaicensis	'Artibeusjamaicensis'	LSUMZ 4851	Mexico, SLP	M	Aj	5.01084	-0.000502558	0.042659	-0.00445661	-0.00567204	4.06406	0.0199765	-0.00263024	-0.00445766	0.00472217	0.00353459	0.0199299
84	Artibeus_jamaicensis	'Artibeusjamaicensis'	LSUMZ 8279	Mexico, Tabasco	M	Aj	5.00631	0.00424389	0.0105686	-0.0208701	-0.00580461	4.12054	0.0124043	-0.00303552	0.00898325	0.000695859	0.00726497	0.0126034
85	Artibeus_jamaicensis	'Artibeusjamaicensis'	LSUMZ 8283	Mexico, Tabasco	M	Aj	5.08382	-0.00493665	0.0318431	-0.00978397	0.00294214	4.08768	0.0126028	-0.00758615	0.0206657	0.0046984	-0.000934785	0.0127215
86	Artibeus_jamaicensis	'Artibeusjamaicensis'	LSUMZ 8263	Mexico, Tabasco	M	Aj	5.10513	0.000391733	0.00287401	-0.000896854	0.00175105	4.18254	0.00402587	-0.0112501	-0.0109974	0.000391069	0.000695469	0.00382567
87	Artibeus_jamaicensis	'Artibeusjamaicensis'	LSUMZ 8264	Mexico, Tabasco	F	Aj	4.88608	0.0107554	0.0223633	0.00166394	0.00566335	3.99777	0.0328338	-0.00460392	-0.0071637	0.00742612	0.0127799	0.0323677
88	Artibeus_jamaicensis	'Artibeusjamaicensis'	LSUMZ 8268	Mexico, Tabasco	F	Aj	5.15009	0.0230843	-0.00120831	0.00291981	-0.015351	4.14468	0.0136639	-0.00219235	0.0146036	-0.00268949	0.0218618	0.0135188
89	Artibeus_jamaicensis	'Artibeusjamaicensis'	LSUMZ 8269	Mexico, Tabasco	F	Aj	5.18631	0.00758758	0.0278101	-0.0116186	-0.0104609	4.15687	0.0192736	0.00708247	-0.00680515	0.0017453	0.0113339	0.0192888
90	Artibeus_jamaicensis	'Artibeusjamaicensis'	LSUMZ 8271	Mexico, Tabasco	F	Aj	5.05905	0.00624139	0.0116681	-0.011126	-0.00212326	4.0634	0.0210813	-0.0125113	0.00547366	-0.00317241	0.00846671	0.0209756
91	Artibeus_jamaicensis	'Artibeusjamaicensis'	LSUMZ 8273	Mexico, Tabasco	F	Aj	5.17667	0.00281064	0.026202	-0.0201753	-0.00281173	4.12443	0.0187064	-0.00816787	-0.000390163	0.00503849	0.00713399	0.0186207
92	Artibeus_jamaicensis	'Artibeusjamaicensis'	LSUMZ 8274	Mexico, Tabasco	F	Aj	5.14337	0.022985	0.00248004	-0.00682668	-0.0139514	4.13368	0.0170124	-0.00524575	0.0175157	0.0172932	0.0231772	0.016668
93	Artibeus_lituratus	'Artibeuslituratus'	LSUMZ 37529	Argentina, Misiones, Parque Nacional Iguazu; Sendero Yacaratia Largo	F	Al	5.84194	0.0376578	-0.00271364	0.000860442	-0.00363885	4.68058	0.0280437	0.0185888	0.00482641	0.00179296	0.0369511	0.0286345
94	Artibeus_lituratus	'Artibeuslituratus'	LSUMZ 37530	Argentina, Misiones, Parque Nacional Iguazu; Sendero Yacaratia Largo	M	Al	5.657	-0.00629232	0.019888	-0.00796207	-0.000342781	4.62487	0.0119415	-0.00834409	0.0119511	-0.01934	-0.00289398	0.0121919
95	Artibeus_lituratus	'Artibeuslituratus'	LSUMZ 37531	Argentina, Misiones, Parque Nacional Iguazu; Sendero Yacaratia Largo	F	Al	5.77934	0.0332668	-0.00878799	-0.00876305	-0.0149868	4.68152	0.0120118	0.00393239	-0.00271699	-0.000702787	0.0332485	0.0129243
96	Artibeus_lituratus	'Artibeuslituratus'	LSUMZ 37532	Argentina, Misiones, Parque Nacional Iguazu; Sendero Yacaratia Largo	F	Al	5.76154	0.0329899	-0.0145466	0.00634481	0.00273952	4.57611	0.0137209	0.00703399	0.000228888	-0.00815755	0.0310425	0.0139966
97	Artibeus_lituratus	'Artibeuslituratus'	LSUMZ 37533	Argentina, Misiones, Parque Nacional Iguazu; Sendero Yacaratia Largo	F	Al	5.59757	0.0218245	0.0152844	-0.00431223	-0.0109209	4.63797	0.0106193	0.00234046	0.0153144	-0.00836883	0.0229988	0.0112295
98	Artibeus_lituratus	'Artibeuslituratus'	LSUMZ 37534	Argentina, Misiones, Parque Nacional Iguazu; Sendero Yacaratia Largo	F	Al	5.79381	0.0263329	0.00815515	0.00749123	0.00435246	4.86102	0.0268329	0.0126754	-0.0158193	-0.0186307	0.0270253	0.0275485
99	Artibeus_lituratus	'Artibeuslituratus'	LSUMZ 37536	Argentina, Misiones, Parque Nacional Iguazu; Sendero Yacaratia Largo	M	Al	5.67643	0.00974778	-0.00577783	-0.0116477	-0.0154056	4.62006	0.0237021	-0.0087624	-0.000833758	0.0142511	0.0104703	0.023879
100	Artibeus_lituratus	'Artibeuslituratus'	LSUMZ 37538	Argentina, Misiones, Parque Nacional Iguazu; Sendero Yacaratia Largo	F	Al	5.48882	0.0130633	0.00587151	-0.00578749	0.000830491	4.48096	0.0140074	0.0114959	-0.00294495	0.0156379	0.0149198	0.0144376
101	Artibeus_lituratus	'Artibeuslituratus'	LSUMZ 37539	Argentina, Misiones, Parque Nacional Iguazu; Sendero Yacaratia Largo	M	Al	5.71722	0.0242548	-0.0120875	0.00320527	0.0068168	4.64554	0.013102	0.00261852	0.00620994	-0.00119665	0.0228402	0.0136786
102	Artibeus_lituratus	'Artibeuslituratus'	LSUMZ 37540	Argentina, Misiones, Parque Nacional Iguazu; Sendero Yacaratia Largo	M	Al	5.59251	0.0116939	0.000964436	-0.0228361	0.0140759	4.6309	0.0220397	0.00971036	0.010245	-0.00613776	0.015053	0.0224747
103	Artibeus_lituratus	'Artibeuslituratus'	LSUMZ 37542	Argentina, Misiones, Parque Nacional Iguazu; Sendero Yacaratia Largo	F	Al	5.81503	0.0231451	-0.0213174	-0.00641381	-0.00373414	4.72346	0.0166288	0.00221838	0.0262154	0.00326763	0.0219115	0.0173
104	Artibeus_lituratus	'Artibeuslituratus'	LSUMZ 37543	Argentina, Misiones, Parque Nacional Iguazu; Sendero Yacaratia Largo	F	Al	5.64544	0.0150566	-0.0148019	-0.00172771	0.018529	4.5941	0.0315525	0.00590306	0.0203538	-0.000633107	0.0150707	0.0321038
105	Artibeus_lituratus	'Artibeuslituratus'	LSUMZ 37544	Argentina, Misiones, Parque Nacional Iguazu; Sendero Yacaratia Largo	M	Al	5.81146	0.0161336	0.0129988	-0.0117622	-0.00175091	4.67416	0.0210037	0.017304	0.0281374	-0.00472895	0.0184833	0.0216411
106	Artibeus_lituratus	'Artibeuslituratus'	LSUMZ 37545	Argentina, Misiones, Parque Nacional Iguazu; Sendero Yacaratia Largo	M	Al	5.75037	-0.00352369	-0.00360752	-0.0137279	0.0185472	4.56971	0.0145016	0.00789295	0.0152415	-0.014467	-0.00088821	0.0148957
107	Artibeus_lituratus	'Artibeuslituratus'	LSUMZ 37546	Argentina, Misiones, Parque Nacional Iguazu; Sendero Yacaratia Largo	M	Al	5.74624	0.00496986	0.00497458	0.00121085	0.00911768	4.70535	0.0289701	0.00579641	0.01328	0.000648539	0.00613911	0.0293898
108	Artibeus_lituratus	'Artibeuslituratus'	LSUMZ 37547	Argentina, Misiones, Parque Nacional Iguazu; Sendero Yacaratia Largo	F	Al	5.63817	0.0120718	-0.0108627	-0.0184429	0.00352036	4.45474	0.0171663	0.00428355	0.0157131	0.00281697	0.0135173	0.0174294
109	Artibeus_lituratus	'Artibeuslituratus'	LSUMZ 37549	Argentina, Misiones, Parque Nacional Iguazu; Sendero Yacaratia Largo	M	Al	5.4846	0.0280871	0.00193223	-0.002807	0.00898202	4.53229	0.0221687	0.0112527	0.0325804	-0.00886467	0.0290585	0.0226779
110	Artibeus_lituratus	'Artibeuslituratus'	LSUMZ 37550	Argentina, Misiones, Parque Nacional Iguazu; Sendero Yacaratia Largo	M	Al	5.32584	-0.0112086	0.0274455	-0.0136557	0.0209585	4.41044	0.0183303	-0.00553372	0.00484479	-0.00879561	-0.0055791	0.0186374
111	Artibeus_lituratus	'Artibeuslituratus'	LSUMZ 37552	Argentina, Misiones, Parque Nacional Iguazu; Sendero Yacaratia Largo	M	Al	5.78691	0.0412685	-0.0121381	-0.0113003	-0.00760808	4.63527	0.025846	0.0104679	-0.00763029	0.0213411	0.0409518	0.02636
112	Artibeus_lituratus	'Artibeuslituratus'	LSUMZ 37554	Argentina, Misiones, Parque Nacional Iguazu; Sendero Yacaratia Largo	F	Al	5.60921	0.0345987	-0.0310387	0.0156602	-0.000452782	4.47214	0.0266056	0.0097075	0.0193927	-0.0108662	0.0306313	0.0270406
113	Artibeus_obscurus	'Artibeusobscurus'	LSUMZ 12232	Peru, Loreto, Rio Curanja, Balta	F	Ao	5.24293	0.0208461	-0.0157079	-0.00271767	-0.0165301	4.1952	0.00430911	-0.0018683	-0.0179973	-0.000972802	0.0183433	0.00419377
114	Artibeus_obscurus	'Artibeusobscurus'	LSUMZ 12231	Peru, Loreto, Rio Curanja, Balta	F	Ao	5.0784	0.0411215	-0.0472268	-0.0152344	-0.0222836	4.06257	0.0082936	-0.0099097	-0.0202483	0.00421088	0.0371768	0.0082286
115	Artibeus_obscurus	'Artibeusobscurus'	LSUMZ 12229	Peru, Loreto, Rio Curanja, Balta	M	Ao	4.96497	0.0284219	-0.0112017	0.00702821	0.00513629	4.10167	0.0170212	0.00271525	-0.00501806	-0.0108647	0.0259252	0.0168447
116	Artibeus_obscurus	'Artibeusobscurus'	LSUMZ 12228	Peru, Loreto, Rio Curanja, Balta	M	Ao	5.15619	0.0300494	0.00283435	0.0135698	-0.0104448	4.22012	0.018345	0.0038173	-0.00132751	-0.00290042	0.0279151	0.0184988
117	Artibeus_obscurus	'Artibeusobscurus'	LSUMZ 12226	Peru, Loreto, Rio Curanja, Balta	M	Ao	5.17201	0.0337454	-0.0187792	-0.00553257	-0.00893221	4.20929	0.0246862	0.00273027	-0.00897564	0.00669232	0.0318958	0.0246179
118	Artibeus_obscurus	'Artibeusobscurus'	LSUMZ 12225	Peru, Loreto, Rio Curanja, Balta	M	Ao	4.76409	0.0478756	-0.00145203	0.00567113	-0.0112891	3.84613	0.0218889	-0.00853016	-0.00803422	0.0114778	0.0456857	0.021825
119	Artibeus_obscurus	'Artibeusobscurus'	LSUMZ 12224	Peru, Loreto, Rio Curanja, Balta	F	Ao	4.92429	0.0286095	-0.0100464	-0.00997071	-0.00684481	3.96408	0.00548594	-0.0092183	-0.01293	0.00789066	0.0274424	0.00524366
120	Artibeus_obscurus	'Artibeusobscurus'	LSUMZ 12223	Peru, Loreto, Rio Curanja, Balta	M	Ao	5.04835	0.0226378	-0.0191232	0.000112464	0.00304782	4.07628	0.0125224	-0.000252634	-0.020962	-0.0227303	0.0201605	0.012502
121	Artibeus_obscurus	'Artibeusobscurus'	LSUMZ 12230	Peru, Loreto, Rio Curanja, Balta	M	Ao	4.86837	0.0181244	-0.0369537	-0.007909	-0.00393818	3.93024	0.0136282	-0.0104669	-0.0142933	0.00561435	0.0150859	0.0135669
122	Artibeus_obscurus	'Artibeusobscurus'	LSUMZ 12233	Peru, Loreto, Rio Curanja, Balta	F	Ao	5.00265	0.0271146	-0.00272747	0.00166071	0.00432982	4.13772	0.0148291	-0.00143968	-0.0243083	-0.00478894	0.0262195	0.0148568
123	Artibeus_obscurus	'Artibeusobscurus'	LSUMZ 8893	Peru, Loreto, Pucallpa. Yarinacocha	M	Ao	5.02574	0.0449447	-0.0333222	-0.00718499	0.000806817	4.0602	0.0279708	0.000637332	0.00424615	-0.00144675	0.0413562	0.0281041
124	Artibeus_obscurus	'Artibeusobscurus'	LSUMZ 12532	Peru, Hu√°nuco	F	Ao	4.94949	-0.0183724	-0.0100968	-0.0154149	-0.010659	4.02327	0.0137402	-0.0152544	-0.00506738	-0.022088	-0.0175985	0.0137872
125	Artibeus_obscurus	'Artibeusobscurus'	LSUMZ 12214	Peru, Loreto, Rio Curanja, Balta	F	Ao	5.07492	0.046206	-0.0256767	0.018485	-0.0118863	4.10622	0.0104081	0.00107122	-0.0150782	-0.0206296	0.0402078	0.0104394
126	Artibeus_obscurus	'Artibeusobscurus'	LSUMZ 12216	Peru, Loreto, Rio Curanja, Balta	M	Ao	4.98623	0.0510782	-0.00116902	0.00061576	0.00439823	4.02705	0.024814	-0.0077107	0.00895529	-0.028896	0.0499979	0.0249184
127	Artibeus_obscurus	'Artibeusobscurus'	LSUMZ 12217	Peru, Loreto, Rio Curanja, Balta	M	Ao	4.85215	0.0389534	0.009757	0.00805296	-0.00881327	4.03494	0.0271357	0.0181196	-0.00337004	0.00933874	0.0376947	0.0269269
128	Artibeus_obscurus	'Artibeusobscurus'	LSUMZ 12218	Peru, Loreto, Rio Curanja, Balta	M	Ao	4.84195	0.0125758	-0.00090706	-0.00415955	-0.00592239	3.9295	0.0158075	-0.00697244	-0.0199442	0.00115566	0.0126862	0.0155899
129	Artibeus_obscurus	'Artibeusobscurus'	LSUMZ 19123	Peru, Cuzco	F	Ao	5.03609	0.0344476	-0.0175671	-0.00874867	-0.0156303	4.00722	0.0159994	-0.0036839	0.00669016	0.0212929	0.032621	0.0160136
130	Artibeus_obscurus	'Artibeusobscurus'	LSUMZ 19125	Peru, Cuzco	F	Ao	5.20237	0.0315047	-0.033565	-0.00168001	0.00709452	4.13915	0.0165067	0.00386282	-0.00124956	0.00134567	0.0284991	0.0163219
131	Artibeus_obscurus	'Artibeusobscurus'	LSUMZ 19126	Peru, Cuzco	F	Ao	5.02922	0.0483982	-0.0227369	0.00274312	0.00272599	4.10967	0.0246558	0.00559599	-0.00786369	0.0157964	0.0454711	0.0244815
132	Artibeus_obscurus	'Artibeusobscurus'	LSUMZ 19115	Peru, Cuzco	F	Ao	4.92238	0.0410686	-0.0109061	0.00685434	0.00165074	3.99841	0.0143888	0.0138583	0.0133797	-0.000724918	0.0383664	0.0143916
133	Artibeus_phaeotis	'Artibeusphaeotis'	LSUMZ 9940	Costa Rica, San Jose	F	Aph	3.41576	-0.0151146	-0.0505198	0.00609111	-0.00793263	2.81948	-0.0323265	-0.000292137	0.0216712	0.00109425	-0.0199989	-0.0324199
134	Artibeus_phaeotis	'Artibeusphaeotis'	LSUMZ 9941	Costa Rica, San Jose	M	Aph	3.40101	-0.0652787	-0.0182533	-0.00630232	0.00568907	2.71683	-0.0546818	-0.0210635	0.00550456	-0.0107758	-0.0649659	-0.0546866
135	Artibeus_phaeotis	'Artibeusphaeotis'	LSUMZ 11939	Mexico, Chiapas	M	Aph	3.48715	-0.0485032	-0.0380208	-0.0163784	-0.0124438	2.74687	-0.0484694	-0.0154515	-0.0120032	-0.00684007	-0.0498129	-0.0485609
136	Artibeus_phaeotis	'Artibeusphaeotis'	LSUMZ 8316	Mexico, Tabasco	M	Aph	3.49728	-0.0370287	-0.0253645	-0.0125984	-0.0114703	2.7784	-0.0372976	-0.0118876	0.0215575	-0.00693781	-0.0377109	-0.0371608
137	Artibeus_phaeotis	'Artibeusphaeotis'	LSUMZ 8317	Mexico, Tabasco	M	Aph	3.60345	-0.0289119	-0.0465999	0.00780772	-0.00579438	2.85607	-0.0496169	-0.00665566	0.00467257	-0.00657981	-0.0338794	-0.0494059
138	Artibeus_phaeotis	'Artibeusphaeotis'	LSUMZ 8318	Mexico, Tabasco	F	Aph	3.37096	-0.0240559	-0.0454864	0.0124996	-0.00263071	2.76036	-0.0485914	-0.00654899	-0.00727066	0.000993221	-0.0292488	-0.0487795
139	Artibeus_phaeotis	'Artibeusphaeotis'	LSUMZ 11046	Mexico, Colima	F	Aph	3.42538	-0.0722406	-0.0163621	-0.00665344	0.00476116	2.67747	-0.0384488	-0.0387561	0.00848236	0.00195643	-0.0712509	-0.0387848
140	Artibeus_phaeotis	'Artibeusphaeotis'	LSUMZ 11047	Mexico, Colima	M	Aph	3.33213	-0.0539697	-0.0395818	-0.0239709	-0.00831009	2.63973	-0.0506218	-0.041774	0.0191537	0.0172663	-0.0539917	-0.0509449
141	Artibeus_phaeotis	'Artibeusphaeotis'	LSUMZ 11048	Mexico, Colima	M	Aph	3.34986	-0.0503308	-0.0218444	0.000746591	0.0112579	2.65889	-0.044651	-0.0197998	0.0246659	0.0028838	-0.0511851	-0.044537
142	Artibeus_phaeotis	'Artibeusphaeotis'	LSUMZ 11049	Mexico, Colima	F	Aph	3.40088	-0.0490483	-0.0152067	-0.00226843	-0.0170845	2.77857	-0.0562745	-0.0259314	0.0140628	-0.0144649	-0.0494349	-0.0559848
143	Artibeus_phaeotis	'Artibeusphaeotis'	LSUMZ 8358	Mexico, Tabasco	M	Aph	3.54974	-0.0382233	-0.0244708	0.00719274	-0.000453874	2.82498	-0.0411358	-0.0141986	0.00181808	-0.0045926	-0.0406921	-0.0411688
144	Artibeus_phaeotis	'Artibeusphaeotis'	LSUMZ 8352	Mexico, Tabasco	F	Aph	3.65611	-0.0184733	-0.00766481	0.00346307	-0.0127848	2.93477	-0.0268214	0.002481	0.00520348	-0.0191593	-0.0203852	-0.0268877
145	Artibeus_phaeotis	'Artibeusphaeotis'	LSUMZ 8353	Mexico, Tabasco	F	Aph	3.5284	-0.017359	-0.019785	0.0173178	-0.0188899	2.88467	-0.0339565	0.0155226	-0.00541347	-0.0173291	-0.0218285	-0.033619
146	Artibeus_phaeotis	'Artibeusphaeotis'	LSUMZ 8354	Mexico, Tabasco	F	Aph	3.49746	-0.0359235	-0.0181421	0.0121457	0.00364154	2.82112	-0.0300641	-0.0168141	-0.0020051	-0.014053	-0.0381367	-0.0301244
147	Artibeus_phaeotis	'Artibeusphaeotis'	LSUMZ 8380	Mexico, Tabasco	M	Aph	3.35578	-0.0487518	-0.0246574	0.00821031	0.0124633	2.7193	-0.0422995	-0.0174681	-0.00858104	-0.00295813	-0.0504464	-0.0424162
148	Artibeus_phaeotis	'Artibeusphaeotis'	LSUMZ 8381	Mexico, Tabasco	M	Aph	3.42515	-0.0376941	-0.00399706	0.0241286	0.00832957	2.76625	-0.0432969	0.0287316	0.00328799	-0.0021867	-0.0398892	-0.0429142
149	Artibeus_phaeotis	'Artibeusphaeotis'	LSUMZ 8382	Mexico, Tabasco	F	Aph	3.47064	-0.0177221	-0.0148725	0.0119966	-0.010366	2.77416	-0.0292116	-0.00995571	0.0108915	-0.00454048	-0.02025	-0.0290288
150	Artibeus_phaeotis	'Artibeusphaeotis'	LSUMZ 8386	Mexico, Tabasco	F	Aph	3.33962	-0.0215462	-0.000824442	0.00652908	0.0084782	2.70838	-0.029864	-0.0119583	-0.00775948	-0.00426938	-0.0218502	-0.0300011
151	Artibeus_phaeotis	'Artibeusphaeotis'	LSUMZ 8387	Mexico, Tabasco	F	Aph	3.5337	-0.0494426	-0.018577	0.00732723	0.00457666	2.82999	-0.043856	-0.0109241	0.0187535	0.00276062	-0.0515028	-0.0437996
152	Artibeus_phaeotis	'Artibeusphaeotis'	LSUMZ 8394	Mexico, Tabasco	M	Aph	3.48674	-0.0433812	-0.0320728	0.00871651	-0.000619371	2.75337	-0.0472272	-0.0146101	-0.00242842	-0.0127223	-0.0468137	-0.0473709
153	Artibeus_planirostris	'Artibeusplanirostris'	LSUMZ 18395	Peru, Dpto Amazonas, Bagua, Had, Valor	F	Apl	5.73063	0.0414329	-0.0227653	-0.000425369	0.0213437	4.62719	0.0394258	-0.00263088	-0.00874158	-0.00768132	0.0397128	0.0393282
154	Artibeus_planirostris	'Artibeusplanirostris'	LSUMZ 16598	Peru, Ayacucho	M	Apl	5.93209	0.0311529	-0.00531327	-0.00704056	0.00975311	4.69094	0.035545	-0.000482418	-0.0052054	-0.00464718	0.0317249	0.0355878
155	Artibeus_planirostris	'Artibeusplanirostris'	LSUMZ 19142	Peru, Cuzco	M	Apl	5.63182	0.0255772	0.0142997	-0.011086	0.00869802	4.57794	0.0475401	-0.00256953	0.0217239	-0.00898249	0.027821	0.0473209
156	Artibeus_planirostris	'Artibeusplanirostris'	LSUMZ 19143	Peru, Cuzco	F	Apl	5.60829	0.0581268	-0.0163822	0.00293965	0.000687202	4.58007	0.0351263	-0.00285794	0.0206565	-0.00864444	0.0550337	0.035062
157	Artibeus_planirostris	'Artibeusplanirostris'	LSUMZ 19144	Peru, Cuzco	M	Apl	5.8349	0.0563605	-0.0180076	-5.25321e-05	0.00252924	4.63347	0.0307264	-0.00998075	-0.0259802	0.00271907	0.0539375	0.0305378
158	Artibeus_planirostris	'Artibeusplanirostris'	LSUMZ 19145	Peru, Cuzco	M	Apl	5.68489	0.0572422	0.003343	0.00177065	-0.013491	4.76634	0.0285638	0.0138568	0.00150896	0.0116975	0.0560075	0.0286415
159	Artibeus_planirostris	'Artibeusplanirostris'	LSUMZ 19147	Peru, Cuzco	M	Apl	5.60558	0.0387301	-0.00853427	0.0100114	0.0187118	4.53753	0.0371222	-0.00293306	-0.0228587	-0.00550898	0.0371205	0.03686
160	Artibeus_planirostris	'Artibeusplanirostris'	LSUMZ 19148	Peru, Cuzco	F	Apl	5.36375	0.0606459	0.0274741	0.0118829	0.00562668	4.53006	0.042395	0.0158964	-0.00461996	-0.00983969	0.0601462	0.0424682
161	Artibeus_planirostris	'Artibeusplanirostris'	LSUMZ 19149	Peru, Cuzco	M	Apl	5.70424	0.0616167	-0.010761	-0.00308371	0.0116658	4.62654	0.0453355	-0.0102265	-0.013325	0.00476669	0.0602011	0.0448918
162	Artibeus_planirostris	'Artibeusplanirostris'	LSUMZ 12533	Peru, Hu√°nuco	F	Apl	5.87003	0.0398631	-0.0123418	-0.00106894	-0.000692318	4.80762	0.0400145	-0.00567402	-0.00474619	0.0120265	0.0389012	0.0398687
163	Artibeus_planirostris	'Artibeusplanirostris'	LSUMZ 12534	Peru, Hu√°nuco	F	Apl	5.71808	0.0231738	-0.00812348	-0.00198226	0.010949	4.67605	0.0438412	-0.000808029	0.0106346	0.00291389	0.0229246	0.0435684
164	Artibeus_planirostris	'Artibeusplanirostris'	LSUMZ 12535	Peru, Hu√°nuco	F	Apl	5.55696	0.0424577	0.00900927	-0.0102029	0.00199716	4.59132	0.0459043	-0.00613654	0.00435627	-0.0199646	0.0436805	0.0461843
165	Artibeus_planirostris	'Artibeusplanirostris'	LSUMZ 12536	Peru, Hu√°nuco	M	Apl	5.76282	0.01374	0.00630147	0.0166743	0.00236631	4.65168	0.0323819	-0.00912065	-0.00104671	-0.0152051	0.0127951	0.0326248
166	Artibeus_planirostris	'Artibeusplanirostris'	LSUMZ 14247	Peru, Hu√°nuco	F	Apl	5.77121	0.0347835	0.00487356	-0.00272529	0.0134475	4.71672	0.0349315	-0.00480026	-0.0125066	-0.0189301	0.0354838	0.0348308
167	Artibeus_planirostris	'Artibeusplanirostris'	LSUMZ 12210	Peru, Loreto, Balta	M	Apl	5.29306	0.0236052	0.0184929	-0.0112744	0.00937672	4.44632	0.0382513	0.00148715	0.0191135	-0.0216373	0.0269573	0.0384954
168	Artibeus_planirostris	'Artibeusplanirostris'	LSUMZ 12211	Peru, Loreto, Balta	F	Apl	5.67773	0.0228667	-0.00312058	0.00282254	0.00569982	4.53382	0.038587	0.0105576	0.00252822	-0.0140333	0.0222448	0.0390878
169	Artibeus_planirostris	'Artibeusplanirostris'	LSUMZ 12212	Peru, Loreto, Balta	F	Apl	5.36008	0.0205821	0.014505	-0.0137464	-0.0138407	4.48368	0.0383589	-0.0170651	-0.0162867	-0.00934485	0.0225956	0.0381157
170	Artibeus_planirostris	'Artibeusplanirostris'	LSUMZ 12213	Peru, Loreto, Balta	F	Apl	5.57256	0.0272148	-0.00477043	0.00171014	0.00935164	4.57787	0.0427006	-0.00899763	0.0021661	-0.011836	0.027083	0.0426442
171	Artibeus_planirostris	'Artibeusplanirostris'	LSUMZ 12546	Peru, Loreto, Balta	M	Apl	5.70076	0.0295558	-0.00278019	-0.0210006	0.0254128	4.51342	0.0495578	-0.0054657	-0.00876745	-0.0150433	0.0322841	0.0494936
172	Artibeus_planirostris	'Artibeusplanirostris'	LSUMZ 16597	Peru, Loreto, Balta	M	Apl	5.54123	0.0267297	-0.000775188	-0.00257298	0.0138576	4.50418	0.0357338	-0.00796555	-0.0171038	-0.00821929	0.0273327	0.0352037
173	Artibeus_toltecus	'Artibeustoltecus'	LSUMZ 11935	Mexico, Nayariti, San Blas	M	At	3.68935	-0.00928693	-0.0196497	0.0121791	0.003477	2.97254	-0.0298993	-0.0158592	0.00511813	-0.00198473	-0.0124156	-0.0300775
174	Artibeus_toltecus	'Artibeustoltecus'	LSUMZ 11937	Mexico, Nayariti, San Blas	M	At	3.84615	-0.0207201	0.0044473	0.00665154	-0.0122723	3.12619	-0.0314622	-0.001411	0.00363988	-0.0100559	-0.0217302	-0.0313878
175	Artibeus_toltecus	'Artibeustoltecus'	LSUMZ 11938	Mexico, Nayariti, San Blas	M	At	3.70036	-0.0134426	0.00293151	0.0190273	-0.0173351	3.05041	-0.0279141	0.0167527	-0.00781858	-0.0057471	-0.0160237	-0.027798
176	Artibeus_toltecus	'Artibeustoltecus'	LSUMZ 4855	Mexico, SLP, el Salto	M	At	3.88102	-0.0368	-0.014552	-0.0164738	0.00719211	3.07116	-0.0296766	-0.00577829	-0.0183441	0.0026084	-0.0359788	-0.0299198
177	Artibeus_toltecus	'Artibeustoltecus'	LSUMZ 25491	Panama, Darien, Cana	F	At	3.9331	-0.0198046	-0.00617589	0.00163852	-0.00636723	3.09974	-0.0262807	0.0140674	-0.00810929	0.0141792	-0.0211491	-0.026337
178	Artibeus_toltecus	'Artibeustoltecus'	LSUMZ 25492	Panama, Darien, Cana	F	At	4.03309	-0.0295906	-0.00505452	0.00278605	0.00181705	3.20486	-0.0296011	-0.00102212	-0.0220502	-0.0108226	-0.0300154	-0.0295575
179	Artibeus_toltecus	'Artibeustoltecus'	LSUMZ 25493	Panama, Darien, Cana	F	At	3.99651	0.0116753	0.00417448	0.00627182	-0.0120497	3.28256	-0.0188679	0.00408935	-0.0101172	0.000768196	0.00964761	-0.0192341
180	Artibeus_toltecus	'Artibeustoltecus'	LSUMZ 9421	Costa Rica, Guanacaste	F	At	3.70704	-0.0279709	-0.0304269	0.000767617	-0.000420428	2.90764	-0.0322525	-0.00782841	0.00122684	-0.00327126	-0.0309485	-0.0322312
181	Artibeus_toltecus	'Artibeustoltecus'	LSUMZ 12863	Costa Rica, San Jose, Fila la Maguina	M	At	3.66641	-0.0481038	-0.0273777	-0.00934571	0.0152723	2.92531	-0.0365183	-0.0195338	0.00604096	-0.00484268	-0.0487659	-0.0366744
182	Artibeus_toltecus	'Artibeustoltecus'	LSUMZ 11934	Mexico, Nayariti, San Blas	F	At	3.66578	-0.0125844	-0.0153691	0.0080157	0.00288632	2.92617	-0.043251	-0.00854165	-0.00125612	0.0157958	-0.0153764	-0.0438392
183	Artibeus_toltecus	'Artibeustoltecus'	LSUMZ 4857	Mexico, SLP, el Salto	F	At	3.90675	0.0136954	-0.0197876	0.0146969	-0.010191	3.15825	-0.0350294	0.0124536	0.0044913	-0.00593198	0.00863551	-0.0352438
184	Artibeus_toltecus	'Artibeustoltecus'	LSUMZ 4856	Mexico, SLP, el Salto	M	At	3.82236	-0.0282658	-0.000377364	0.00649612	-0.0166455	3.04934	-0.0303438	0.00296407	-0.0162907	0.000774415	-0.0294855	-0.0305412
185	Artibeus_toltecus	'Artibeustoltecus'	LSUMZ 4858	Mexico, SLP, el Salto	F	At	3.72708	-0.019075	-0.00903606	0.0183278	0.00186308	2.98598	-0.0278858	0.0023947	0.00134075	0.00528736	-0.0222208	-0.0284427
186	Artibeus_toltecus	'Artibeustoltecus'	LSUMZ 4860	Mexico, SLP, Huichihuayan	F	At	3.74093	-0.00854129	-0.0257912	0.0147804	0.0114394	3.03298	-0.0187038	-0.0104499	-0.00592516	0.00245919	-0.0121264	-0.019172
Lateral View PCA Importance
	PC1	PC2	PC3	PC4	PC5	PC6	PC7	PC8	PC9	PC10
Standard deviation	0.0332755	0.01885	0.0108955	0.0103226	0.00855378	0.00715836	0.00608544	0.00555485	0.00502215	0.00465312
Proportion of Variance	0.54397	0.17456	0.05832	0.05235	0.03595	0.02517	0.01819	0.01516	0.01239	0.01064
Cumulative Proportion	0.54397	0.71853	0.77685	0.8292	0.86515	0.89032	0.90851	0.92367	0.93606	0.9467
Ventral View PCA Importance
	PC1	PC2	PC3	PC4	PC5	PC6	PC7	PC8	PC9	PC10
Standard deviation	0.0312658	0.0146643	0.0118622	0.0101069	0.00880223	0.00735466	0.0069443	0.0056056	0.00532538	0.00492057
Proportion of Variance	0.51696	0.11372	0.07441	0.05402	0.04097	0.0286	0.0255	0.01662	0.015	0.0128
Cumulative Proportion	0.51696	0.63068	0.70509	0.75911	0.80008	0.82869	0.85419	0.87081	0.8858	0.89861

## Sheet: Table S3-Artibeus Stats
Interspecific statistical analyses. Results for lateral and ventral view Procrustes ANOVAs of shape and size; shape, species, sex, and size; and size, species, and sex. Tests of phylogenetic signal in lateral and ventral view for shape and size.
Artibeus spp. ANOVAs
Shape (Lateral View) ~ log10(Centroid Size)
	Df	SS	MS	Rsq	F	p
Size	1	0.13908	0.139078	0.36934	107.76	0.001
Residuals	184	0.23748	0.001291	0.63066
Total	185	0.37656
Shape (Lateral View) ~ Species * Sex * log10(Centroid Size) –– (Evaluating shape dimorphism)
	Df	SS	MS	Rsq	F	Z	Pr(>F)
Species	10	0.22789	0.022789	0.605189	28.058	12.0924	0.001
Sex	1	0.00339838	0.00339838	0.00902481	4.18412	4.65401	0.001
Size	1	0.003672	0.003672	0.00975142	4.52099	5.04012	0.001
Species:Sex	10	0.00960646	0.000960646	0.0255111	1.18275	6.59552	0.001
Species:Size	10	0.00971828	0.000971828	0.025808	1.19652	6.73333	0.001
Sex:Size	1	0.000107665	0.000107665	0.000285917	0.132558	-1.40524	0.919
Species:Sex:Size	10	0.0068334	0.00068334	0.0181469	0.841334	5.44094	0.001
Residuals	142	0.115334	0.000812211	0.306283
Total	185	0.37656
log10(Centroid Size–Lateral View) ~ Species * Sex –– Evaluating size dimorphism
	Df	SS	MS	F	Pr(>F)
Species	10	143.16	14.316	962.326	0.001
Sex	1	0.11	0.11	7.382	0.00729
Species:Sex	10	0.12	0.012	0.83	0.60028
Residuals	164	2.44	0.015
Phylogenetic Signal (Lateral Shape)
K	0.8024
p-value	0.008
Phylogenetic Signal (Lateral log10(Centroid Size))
K	2.5107
p-value	0.001
Shape (Ventral View) ~ log10(Centroid Size)
	Df	SS	MS	Rsq	F	p
Size	1	0.16135	0.161353	0.46125	157.53	0.001
Residuals	184	0.18847	0.001024	0.53875
Total	185	0.34982
Shape (Ventral View) ~ Species * Sex * log10(Centroid Size) –– (Evaluating shape dimorphism)
	Df	SS	MS	Rsq	F	Z	Pr(>F)
Species	10	0.22044	0.022044	0.630153	31.3243	13.0578	0.001
Sex	1	0.000808546	0.000808546	0.00231132	1.14894	3.08107	0.001
Size	1	0.00346364	0.00346364	0.00990121	4.9218	6.70132	0.001
Species:Sex	10	0.00809655	0.000809655	0.0231449	1.15051	9.06015	0.001
Species:Size	10	0.00961386	0.000961386	0.0274823	1.36612	10.1983	0.001
Sex:Size	1	0.000643809	0.000643809	0.0018404	0.914847	3.09055	0.003
Species:Sex:Size	10	0.00682305	0.000682305	0.0195045	0.969549	8.13282	0.001
Residuals	142	0.0999302	0.000703734	0.285662
Total	185	0.34982
log10(Centroid Size–Ventral View) ~ Species * Sex –– Evaluating size dimorphism
	Df	SS	MS	F	Pr(>F)
Species	10	97.29	9.729	1173.54	0.001
Sex	1	0.09	0.092	11.087	0.00107
Species:Sex	10	0.07	0.007	0.831	0.59945
Residuals	164	1.36	0.008
Phylogenetic Signal (Ventral Shape)
K	1.0493
p-value	0.007
Phylogenetic Signal (Ventral log10(Centroid Size))
K	2.4987
p-value	0.001

## Sheet: Table S4-ArtibeusMeans
Interspecific data for species means used in phylogenetic signal analyses including species names, centroid sizes, and PC1–4 scores for lateral and ventral view.
	Taxon	PhylogenyName	Abbreviation	LatCSMean	VentCSMean	PC1LatMeans	PC2LatMeans	PC3LatMeans	PC4LatMeans	PC1VentMeans	PC2VentMeans	PC3VentMeans	PC4VentMeans
1	Artibeus_fraterculus	'Artibeusfraterculus'	Afr	4.84331	3.9148	-0.00723697	0.0104972	-0.00337368	0.00865411	-0.0145648	0.0124128	-0.000483061	-0.00248613
2	Artibeus_lituratus	'Artibeuslituratus'	Al	5.67597	4.61056	-0.0234671	0.0110445	0.0161374	-0.00521269	-0.0140433	-0.00511173	-0.00816954	-0.00234503
3	Artibeus_planirostris	'Artibeusplanirostris'	Apl	5.64604	4.60364	-0.0152198	-0.00858147	-0.00450186	0.013834	-0.0184544	-0.0111717	-0.00253174	-0.00323366
4	Artibeus_fimbriatus	'Artibeusfimbriatus'	Afi	5.68753	4.60603	-0.0115341	0.00802148	0.000467199	0.00036199	-0.0215183	-0.00538492	0.00298128	0.012687
5	Artibeus_jamaicensis	'Artibeusjamaicensis'	Aj	5.07309	4.08893	-0.00460651	0.00932207	-0.0153217	-0.0136456	-0.0110053	-0.00173403	0.00574174	-0.00346663
6	Artibeus_obscurus	'Artibeusobscurus'	Ao	5.00714	4.05895	-0.00681804	-0.00786969	-0.0100036	-0.00099625	-0.0147863	0.0173762	0.0023875	-0.00333799
7	Artibeus_toltecus	'Artibeustoltecus'	At	3.80828	3.05665	0.00916088	-0.00699448	-0.00197997	0.0010333	0.0124861	-0.00177338	-0.0065498	0.00574435
8	Artibeus_phaeotis	'Artibeusphaeotis'	Aph	3.45636	2.77248	0.00226712	-0.0339912	0.00592121	-0.00601574	0.0204093	-0.00019046	0.0141023	0.00306157
9	Artibeus_aztecus	'Artibeusaztecus'	Aaz	4.10094	3.29565	0.0186693	0.0152032	0.00483438	-0.000792741	0.0185542	-0.00525625	-0.012902	-0.00273819
10	Artibeus_andersoni	'Artibeusanderseni'	Aan	3.28406	2.64056	0.03223	0.00474022	0.000606151	0.00335465	0.0275093	0.0112037	-0.00463657	0.0027414
11	Artibeus_cinereus	'Artibeuscinereus'	Aci	3.57248	2.89263	0.00655517	-0.00139181	0.00721451	-0.000575112	0.0154135	-0.0103702	0.0100599	-0.00662667
Lateral View Means PCA Importance
	PC1	PC2	PC3	PC4	PC5	PC6	PC7	PC8	PC9	PC10
Standard deviation	0.0159838	0.0140672	0.00861322	0.00728177	0.00561614	0.00457542	0.00306587	0.00242853	0.00219523	0.00182126
Proportion of Variance	0.38916	0.30143	0.11301	0.08077	0.04805	0.03189	0.01432	0.00898	0.00734	0.00505
Cumulative Proportion	0.38916	0.6906	0.8036	0.88437	0.93242	0.9643	0.97862	0.98761	0.99495	1
Ventral View Means PCA Importance
	PC1	PC2	PC3	PC4	PC5	PC6	PC7	PC8	PC9	PC10
Standard deviation	0.0186111	0.00950169	0.00807389	0.00554574	0.00464076	0.00410969	0.00376702	0.00300426	0.00286812	0.00173493
Proportion of Variance	0.57207	0.14911	0.10766	0.0508	0.03557	0.02789	0.02344	0.01491	0.01359	0.00497
Cumulative Proportion	0.57207	0.72118	0.82884	0.87964	0.9152	0.9431	0.96654	0.98144	0.99503	1
PGLS: Shape ~ log10(Size) + Species (Lateral View)
	df	SS	MS	Rsq	p
Size	1	0.00017518	0.00017518	0.14513	0.564
Species	9	0.00103193	0.00011466	0.85487	0.559
Residuals	0	0
Total	10	0.00120711
PGLS: Shape ~ log10(Size) + Species (Ventral View)
	df	SS	MS	Rsq	p
Size	1	0.00019665	0.00019665	0.22873	0.514
Species	9	0.0006631	7.3678e-05	0.77127	0.498
Residuals	0	0
Total	10	0.00085975

## Sheet: Table S5-Lituratus
Intraspecific data for A. lituratus including specimen number, locality, sex, country of origin, principal component scores for PC1–4 in lateral and ventral views, and centroid sizes in lateral and ventral views.
	Taxon	Number	Locality	Sex	Country	CSizeLat	PC1Lat	PC2Lat	PC3Lat	PC4Lat	CSizeVent	PC1Vent	PC2Vent	PC3Vent	PC4Vent
1	Artibeus_lituratus	LSUMZ 37529	Argentina, Misiones, Parque Nacional Iguazu; Sendero Yacaratia Largo	F	Argentina	5.84194	0.00830147	-0.0238181	-0.00461505	-0.0046224	4.68058	0.0223772	-0.00718901	0.00975604	0.0115746
2	Artibeus_lituratus	LSUMZ 37530	Argentina, Misiones, Parque Nacional Iguazu; Sendero Yacaratia Largo	M	Argentina	5.657	0.0528057	-0.00253036	-0.00650678	-0.0132311	4.62487	-0.00903258	0.0106934	-0.00495361	0.00767694
3	Artibeus_lituratus	LSUMZ 37531	Argentina, Misiones, Parque Nacional Iguazu; Sendero Yacaratia Largo	F	Argentina	5.77934	-0.00168934	-0.0154085	-0.0105504	-0.015549	4.68152	0.0209938	0.0137191	0.00630722	0.00396466
4	Artibeus_lituratus	LSUMZ 37532	Argentina, Misiones, Parque Nacional Iguazu; Sendero Yacaratia Largo	F	Argentina	5.76154	0.00374526	-0.0126867	0.00447217	0.00190909	4.57611	0.0118917	-0.000605715	-0.00953224	0.00475833
5	Artibeus_lituratus	LSUMZ 37533	Argentina, Misiones, Parque Nacional Iguazu; Sendero Yacaratia Largo	F	Argentina	5.59757	0.0293879	-0.0165195	-0.0194031	-0.00224246	4.63797	-0.000209943	0.00238318	-0.00917914	-0.00147288
6	Artibeus_lituratus	LSUMZ 37534	Argentina, Misiones, Parque Nacional Iguazu; Sendero Yacaratia Largo	F	Argentina	5.79381	0.0268058	-0.0240302	0.00222249	-0.000214391	4.86102	0.0220339	0.00412598	-0.0152303	0.0274481
7	Artibeus_lituratus	LSUMZ 37536	Argentina, Misiones, Parque Nacional Iguazu; Sendero Yacaratia Largo	M	Argentina	5.67643	0.019822	0.000934951	-0.0118373	-0.0214358	4.62006	0.0207369	0.0113126	0.0106195	-0.00885922
8	Artibeus_lituratus	LSUMZ 37538	Argentina, Misiones, Parque Nacional Iguazu; Sendero Yacaratia Largo	F	Argentina	5.48882	0.0278108	-0.00940802	-0.000849146	-0.0107931	4.48096	0.0323491	0.00185183	0.000284015	-0.0101306
9	Artibeus_lituratus	LSUMZ 37539	Argentina, Misiones, Parque Nacional Iguazu; Sendero Yacaratia Largo	M	Argentina	5.71722	0.00862198	-0.00882016	0.0113752	0.00154264	4.64554	0.0118929	0.00132235	-0.00542023	-0.00455106
10	Artibeus_lituratus	LSUMZ 37540	Argentina, Misiones, Parque Nacional Iguazu; Sendero Yacaratia Largo	M	Argentina	5.59251	0.0278873	0.0111041	-0.00477186	0.0068212	4.6309	0.00893088	-0.00598953	0.000696011	0.00653627
11	Artibeus_lituratus	LSUMZ 37542	Argentina, Misiones, Parque Nacional Iguazu; Sendero Yacaratia Largo	F	Argentina	5.81503	0.00390323	0.00255466	-0.000539337	-0.00530323	4.72346	-5.18024e-05	-0.00871884	0.00327009	-0.012003
12	Artibeus_lituratus	LSUMZ 37543	Argentina, Misiones, Parque Nacional Iguazu; Sendero Yacaratia Largo	F	Argentina	5.64544	0.014629	0.00072381	0.0195452	0.000165599	4.5941	0.00375576	-0.011715	0.0131862	0.00337366
13	Artibeus_lituratus	LSUMZ 37544	Argentina, Misiones, Parque Nacional Iguazu; Sendero Yacaratia Largo	M	Argentina	5.81146	0.0293354	-0.00550525	-0.0137223	0.00395648	4.67416	0.00232457	-0.0217002	0.00743537	0.00151224
14	Artibeus_lituratus	LSUMZ 37545	Argentina, Misiones, Parque Nacional Iguazu; Sendero Yacaratia Largo	M	Argentina	5.75037	0.0355719	0.0168041	0.00990217	0.000557286	4.56971	-0.0017678	-0.00795183	-0.0204472	-0.00118646
15	Artibeus_lituratus	LSUMZ 37546	Argentina, Misiones, Parque Nacional Iguazu; Sendero Yacaratia Largo	M	Argentina	5.74624	0.0329619	-0.00297089	0.00770561	-5.2877e-05	4.70535	0.00913945	-0.00773544	0.0140814	0.00654213
16	Artibeus_lituratus	LSUMZ 37547	Argentina, Misiones, Parque Nacional Iguazu; Sendero Yacaratia Largo	F	Argentina	5.63817	0.0150383	0.00897065	0.000458796	-0.00469118	4.45474	0.00501541	-0.00702099	-0.00373624	-0.00996553
17	Artibeus_lituratus	LSUMZ 37549	Argentina, Misiones, Parque Nacional Iguazu; Sendero Yacaratia Largo	M	Argentina	5.4846	0.0202403	-0.012137	-0.0002837	0.00847999	4.53229	-0.00827237	-0.0185104	0.00293385	0.00188982
18	Artibeus_lituratus	LSUMZ 37550	Argentina, Misiones, Parque Nacional Iguazu; Sendero Yacaratia Largo	M	Argentina	5.32584	0.0640705	0.00324885	0.0046422	0.00332495	4.41044	0.00566599	0.0122509	0.00320189	0.00400072
19	Artibeus_lituratus	LSUMZ 37552	Argentina, Misiones, Parque Nacional Iguazu; Sendero Yacaratia Largo	M	Argentina	5.78691	-0.00292188	-0.01107	-0.0122331	-0.000938513	4.63527	0.0377921	-0.000585486	0.00552935	-0.00699665
20	Artibeus_lituratus	LSUMZ 37554	Argentina, Misiones, Parque Nacional Iguazu; Sendero Yacaratia Largo	F	Argentina	5.60921	-0.00799067	-0.0196904	0.0180455	-0.0186976	4.47214	-0.000978343	-0.0111358	-0.00175347	0.0061876
21	Artibeus_lituratus	LSUMZ 8621	British Honduras, 3/4 mil E Corozal	F	Belize	5.33244	-0.0205509	0.0176309	-0.0176808	0.00191021	4.24656	-0.00860328	0.0207121	-0.012764	-0.00487102
22	Artibeus_lituratus	LSUMZ 8622	British Honduras, 3/4 mil E Corozal	F	Belize	5.19959	0.00649051	-0.00683389	-0.00677398	0.0187658	4.28055	-0.0235277	-0.00242182	0.00394641	0.00393914
23	Artibeus_lituratus	LSUMZ 8615	British Honduras, 3/4 mil E Corozal	M	Belize	5.26864	-0.0176771	0.000348458	-0.000461095	0.0158823	4.19623	0.00258594	0.00536147	-0.00522954	-0.0107487
24	Artibeus_lituratus	LSUMZ 8614	British Honduras, 3/4 mil E Corozal	F	Belize	5.25894	-0.00854131	0.0255859	-0.0187319	0.011218	4.29059	-0.0185776	0.0176255	-0.00976565	0.00821432
25	Artibeus_lituratus	LSUMZ 8613	British Honduras, 3/4 mil E Corozal	F	Belize	5.2017	-0.0227022	-0.00535175	0.00611155	0.00334074	4.1558	-0.00765507	0.00103807	-0.011356	0.00378911
26	Artibeus_lituratus	LSUMZ 8612	British Honduras, 3/4 mil E Corozal	F	Belize	5.33956	0.00395274	0.0253141	-0.0102685	0.0132781	4.269	-0.0342958	0.00786186	0.0115072	-0.0097221
27	Artibeus_lituratus	LSUMZ 3566	Trinidad, Port of Spain	F	Trinidad	5.75682	-0.0139534	-9.53177e-05	0.0143426	0.00108426	4.61359	-0.0104628	-0.018073	-0.0144764	0.00114077
28	Artibeus_lituratus	LSUMZ 3564	Trinidad, Port of Spain	F	Trinidad	5.69007	-0.0223279	-0.00812054	-0.0301656	0.00438838	4.55373	0.012552	0.00486883	-0.00486148	-0.0103382
29	Artibeus_lituratus	LSUMZ 3561	Trinidad, Port of Spain	F	Trinidad	5.93481	-0.029941	0.0186062	0.000271988	0.00356453	4.84362	0.00676267	0.00320707	0.00669769	-0.00696237
30	Artibeus_lituratus	LSUMZ 3557	Trinidad, Port of Spain	M	Trinidad	5.55164	-0.0143352	-0.000551303	-0.00542584	0.00324571	4.53975	-0.00531689	-0.00303408	0.0127109	-0.00129749
31	Artibeus_lituratus	LSUMZ 3553	Trinidad, Port of Spain	F	Trinidad	5.90172	-0.0431574	0.0192875	-0.0104509	-0.00725229	4.77363	-0.0110075	-0.0174069	-0.00837651	-0.00330658
32	Artibeus_lituratus	LSUMZ 3567	Trinidad, Port of Spain	M	Trinidad	5.68329	-0.0321425	0.0108833	0.00444345	0.00691739	4.65113	-0.0101557	-0.00724363	-0.00807414	0.00306196
33	Artibeus_lituratus	LSUMZ 3568	Trinidad, Port of Spain	M	Trinidad	5.53868	0.00198461	-0.0284547	0.0371105	0.0149875	4.5346	0.00589864	0.00530575	0.011844	0.0125569
34	Artibeus_lituratus	LSUMZ 9408	Costa Rica, Puntarenas, Rincon de Osa	M	Costa Rica	5.80746	0.000579144	-0.00681898	-0.00450314	-0.0155231	4.80935	-0.0195133	-0.00826492	-0.00225785	-0.00347366
35	Artibeus_lituratus	LSUMZ 9407	Costa Rica, Puntarenas, Rincon de Osa	F	Costa Rica	5.8382	0.00812475	0.0203455	0.00624648	-0.00605893	4.74165	-0.0105499	0.0244332	0.0184474	0.00810442
36	Artibeus_lituratus	LSUMZ 9807	Costa Rica, Guanacaste, Playa del Coco	F	Costa Rica	5.48012	-0.0161159	0.0173896	0.00196967	-0.000691702	4.4118	-0.0109282	0.00911995	-0.00820624	0.000390694
37	Artibeus_lituratus	LSUMZ 29477	Costa Rica, Limon, 4 km S 5 km W Liverpool	F	Costa Rica	5.6596	0.00558	0.00571147	0.0039612	-0.00323167	4.6361	-0.0113769	-0.0102195	0.0026338	-0.00922939
38	Artibeus_lituratus	LSUMZ 8950	Costa Rica, San Jose, San Pedro	M	Costa Rica	5.41977	-0.00366565	0.0110108	0.0109589	0.0160995	4.27518	0.00152364	0.00498099	0.00297798	-0.00323629
39	Artibeus_lituratus	LSUMZ 8951	Costa Rica, San Jose, San Pedro	F	Costa Rica	5.45715	-0.0249014	0.0258758	0.00951649	-0.0126946	4.34053	-0.00888037	0.0172772	-0.004689	-0.00926353
40	Artibeus_lituratus	LSUMZ 28344	Costa Rica, Puntarenas, 5km S 6km W Esparza	M	Costa Rica	5.84525	0.0174291	0.0224333	-0.00782349	0.00350808	4.64915	-0.0230724	0.00377124	0.00478287	-0.00122221
41	Artibeus_lituratus	LSUMZ 25186	Costa Rica, San Jose, 14km S La Gloria	M	Costa Rica	5.54914	-0.00460809	-0.00908043	0.0180137	0.00349135	4.62378	-0.0115949	0.0155287	0.00345022	-0.0124934
42	Artibeus_lituratus	LSUMZ 12848	Costa Rica, San Jose, Santa Ana	M	Costa Rica	5.04946	0.0092984	-0.000602327	-0.00613673	0.0128689	4.11745	0.00814841	0.00771901	0.00580475	-0.00157692
43	Artibeus_lituratus	LSUMZ 12850	Costa Rica, San Jose, Santa Ana	M	Costa Rica	5.48148	-0.00503763	0.0322036	-0.00626479	0.00664024	4.3136	-0.0247783	0.00656696	0.00925632	-0.0107324
44	Artibeus_lituratus	LSUMZ 12849	Costa Rica, San Jose, Santa Ana	M	Costa Rica	5.40385	0.00403055	0.0209061	0.0124758	0.00633683	4.31703	-0.0122851	0.022977	0.00151133	-0.00173193
45	Artibeus_lituratus	LSUMZ 11037	Mexico, Colima, 2km S Cerro de Ortega	F	Mexico, Colima	5.24388	0.00860843	-0.0016996	-0.0139614	0.000337116	4.25658	-0.0169813	-0.00180009	0.00657471	0.00598309
46	Artibeus_lituratus	LSUMZ 11038	Mexico, Colima, 2km S Cerro de Ortega	F	Mexico, Colima	5.43806	-0.0118126	0.0119346	0.00911782	0.000166397	4.44057	0.000550591	0.0113531	0.000876342	-0.00384444
47	Artibeus_lituratus	LSUMZ 11039	Mexico, Colima, 2km S Cerro de Ortega	F	Mexico, Colima	5.38147	0.0166673	0.0273723	-4.12798e-05	-0.00671726	4.41641	-0.0371517	-0.00756567	0.000159561	0.00425098
48	Artibeus_lituratus	LSUMZ 11041	Mexico, Colima, Periquillo, Rio Armeria	M	Mexico, Colima	5.27806	0.0162128	0.0203128	-0.00633424	-0.00239665	4.34088	-0.0347875	-0.00135337	-0.00496254	-0.00282131
49	Artibeus_lituratus	LSUMZ 11042	Mexico, Colima, Periquillo, Rio Armeria	F	Mexico, Colima	5.20835	0.0112527	0.0138083	0.0134391	0.012273	4.31403	-0.021124	0.00351782	-0.00426196	0.0111795
50	Artibeus_lituratus	LSUMZ 11043	Mexico, Colima, Periquillo, Rio Armeria	F	Mexico, Colima	5.33872	0.0141721	0.00370297	-0.027341	0.0140209	4.30972	-0.017707	0.0136555	0.0074472	-0.00089269
51	Artibeus_lituratus	LSUMZ 11045	Mexico, Colima, Puente San Vincente, Rio Naranjo, S Cerro de Ortega	F	Mexico, Colima	5.38636	0.000209088	0.0334283	0.00446477	-0.00470651	4.24851	0.00572029	0.0221524	0.00575937	-0.00843283
52	Artibeus_lituratus	LSUMZ 11044	Mexico, Colima, Puente San Vincente, Rio Naranjo, S Cerro de Ortega	M	Mexico, Colima	5.38303	0.0178816	0.0349637	-0.00729501	0.00238189	4.31267	-0.0303253	0.00667239	-0.011815	-0.00504652
53	Artibeus_lituratus	LSUMZ 8286	Mexico, Tabasco, 1mi E Teapa	M	Mexico, Tabasco	5.56723	0.00889045	-0.00257213	0.00752642	0.00493193	4.50708	-0.0136265	-0.00487563	0.00597451	-0.000375555
54	Artibeus_lituratus	LSUMZ 8287	Mexico, Tabasco, 1mi E Teapa	M	Mexico, Tabasco	5.53686	-0.00448385	0.0105698	-0.000687902	-0.000904732	4.48941	0.00852087	-0.0161096	-0.00564972	-0.00787288
55	Artibeus_lituratus	LSUMZ 8288	Mexico, Tabasco, 1mi E Teapa	F	Mexico, Tabasco	5.59718	0.00234135	-0.0234055	0.00625557	-0.000866024	4.58718	0.00176701	0.00785144	0.00571628	0.00435911
56	Artibeus_lituratus	LSUMZ 8289	Mexico, Tabasco, 1mi E Teapa	F	Mexico, Tabasco	5.67847	-0.0193413	-0.0155568	0.00224782	-0.00440723	4.65106	0.00936315	0.0100864	0.021834	0.00839078
57	Artibeus_lituratus	LSUMZ 8290	Mexico, Tabasco, 1mi E Teapa	M	Mexico, Tabasco	5.57442	0.0253439	-0.00769839	-0.00655722	0.000972623	4.67937	-0.0140966	0.00785216	-0.00819111	0.00810628
58	Artibeus_lituratus	LSUMZ 8291	Mexico, Tabasco, 1mi E Teapa	F	Mexico, Tabasco	5.82321	-0.00260991	-0.00845134	-0.000383534	-0.00303576	4.70276	-0.00364211	-0.00883274	-0.0131451	0.00691109
59	Artibeus_lituratus	LSUMZ 8292	Mexico, Tabasco, 1mi E Teapa	F	Mexico, Tabasco	5.66382	0.0221272	-0.0241689	0.00833553	0.00286063	4.62368	-0.00185133	-0.0177441	-0.00428967	0.00898497
60	Artibeus_lituratus	LSUMZ 7513	Mexico, Tabasco, Teapa	M	Mexico, Tabasco	5.3718	0.0047418	-0.00153165	-0.00730325	-0.00304517	4.40019	0.00274732	0.00969744	0.000207005	0.00607614
61	Artibeus_lituratus	LSUMZ 7514	Mexico, Tabasco, Teapa	F	Mexico, Tabasco	5.71291	-0.0109801	0.00405166	0.00521114	-0.00552876	4.55567	0.00830404	-0.00062353	-0.00561784	-0.0041582
62	Artibeus_lituratus	LSUMZ 8280	Mexico, Tabasco, Balanc√°n	M	Mexico, Tabasco	5.25664	0.00931008	0.0206594	-0.00266909	0.025681	4.30893	-0.0366339	-0.00467212	0.00218793	-0.00238018
63	Artibeus_lituratus	LSUMZ 8281	Mexico, Tabasco, Balanc√°n	F	Mexico, Tabasco	5.21299	-0.00161047	0.0255483	-0.0001653	0.0195422	4.1589	-0.0149217	0.0326195	-0.00629192	-0.0108279
64	Artibeus_lituratus	LSUMZ 8282	Mexico, Tabasco, Balanc√°n	M	Mexico, Tabasco	5.11112	-0.0187668	0.0209369	-0.00908552	0.0123182	4.03881	-0.0186816	-0.00115524	0.0200937	-0.017798
65	Artibeus_lituratus	LSUMZ 8285	Mexico, Tabasco, Teapa	M	Mexico, Tabasco	5.56734	0.00146426	-0.00684211	0.00390622	-0.01422	4.6278	-0.0114431	0.0128066	-0.00175302	0.0130073
66	Artibeus_lituratus	LSUMZ 8293	Mexico, Tabasco, Teapa	F	Mexico, Tabasco	5.52219	-0.00209893	-0.0375724	-0.00807537	0.02481	4.61877	-0.0179001	-0.0170251	0.0187618	0.0168721
67	Artibeus_lituratus	LSUMZ 8294	Mexico, Tabasco, Teapa	F	Mexico, Tabasco	5.59517	0.00436742	0.000197298	0.00443589	-0.00298228	4.58911	0.00588925	0.00769047	-0.0115488	0.00258702
68	Artibeus_lituratus	LSUMZ 8295	Mexico, Tabasco, Teapa	F	Mexico, Tabasco	5.68637	-0.00261636	-0.00822574	-0.00857424	-0.00047778	4.6726	-0.0156785	-0.00883268	-0.00887966	0.0150947
69	Artibeus_lituratus	LSUMZ 8296	Mexico, Tabasco, Teapa	M	Mexico, Tabasco	5.48273	0.0108864	0.00515463	0.00848847	-0.00338813	4.44811	-0.00451323	0.0155561	0.00173767	-0.0095457
70	Artibeus_lituratus	LSUMZ 8297	Mexico, Tabasco, Teapa	F	Mexico, Tabasco	5.66696	-0.00880358	-0.00791323	-0.00228104	-0.0048305	4.54434	0.00451415	-0.00244705	0.0248963	-0.00330777
71	Artibeus_lituratus	LSUMZ 8298	Mexico, Tabasco, Teapa	F	Mexico, Tabasco	5.67913	-0.0149519	0.0146189	-0.00573785	-0.01354	4.53446	0.0119849	0.00499542	-0.00159744	-0.00451617
72	Artibeus_lituratus	LSUMZ 8300	Mexico, Tabasco, Teapa	M	Mexico, Tabasco	5.71572	0.00473473	0.00993925	0.018161	0.00577425	4.76429	-0.0245444	-0.00928803	-0.00253394	0.00589099
73	Artibeus_lituratus	LSUMZ 8305	Mexico, Tabasco, Teapa	M	Mexico, Tabasco	5.51938	0.00484978	-0.0108935	0.00291436	0.0102077	4.56924	-0.0159818	0.000279296	0.0097919	0.00659972
74	Artibeus_lituratus	LSUMZ 37479	Paraguay, Caaguazu, Reserva Natural Privada Morombi	F	Paraguay	5.77102	-0.0208203	-0.0272785	-0.0170277	0.0068206	4.70419	0.00621901	-0.00935783	0.0157215	-0.00371753
75	Artibeus_lituratus	LSUMZ 37478	Paraguay, Caaguazu, Reserva Natural Privada Morombi	M	Paraguay	5.74336	-0.014388	-0.00381053	0.00569611	0.00502862	4.67392	0.00853358	-0.00320397	-0.0123895	-0.00907375
76	Artibeus_lituratus	LSUMZ 37477	Paraguay, Caaguazu, Reserva Natural Privada Morombi	F	Paraguay	5.85047	-0.0211686	-0.0366738	-0.00457648	-0.00424744	4.75477	0.0263131	0.00228122	0.00960058	0.0202432
77	Artibeus_lituratus	LSUMZ 37476	Paraguay, Caaguazu, Reserva Natural Privada Morombi	F	Paraguay	5.65046	0.00561764	-0.0176971	-0.00272421	-0.00816436	4.58569	0.0146989	-0.0138823	-0.0122893	-0.0035362
78	Artibeus_lituratus	LSUMZ 37475	Paraguay, Caaguazu, Reserva Natural Privada Morombi	M	Paraguay	5.74736	-0.0165762	-0.0167316	0.00262288	-0.00100234	4.70369	0.0255136	0.0127447	-0.00289984	0.00150718
79	Artibeus_lituratus	LSUMZ 37474	Paraguay, Caaguazu, Reserva Natural Privada Morombi	F	Paraguay	5.67021	-0.0132239	-0.0221835	-0.0106896	0.00340168	4.75162	-0.00863705	-0.0139742	-0.0128072	-0.00802369
80	Artibeus_lituratus	LSUMZ 37473	Paraguay, Caaguazu, Reserva Natural Privada Morombi	F	Paraguay	5.74448	-0.0258863	-0.0141656	-0.00271368	0.00773131	4.71154	0.0101353	-0.00933557	-0.00526324	0.0161719
81	Artibeus_lituratus	LSUMZ 37472	Paraguay, Caaguazu, Reserva Natural Privada Morombi	M	Paraguay	5.81594	-0.0237	0.0132211	0.00723099	-0.00402538	4.60376	0.0271904	-0.0068956	-0.00470726	-0.00748088
82	Artibeus_lituratus	LSUMZ 37471	Paraguay, Caaguazu, Reserva Natural Privada Morombi	M	Paraguay	5.73746	-0.00122502	-0.0085982	0.00174824	0.00652578	4.73343	0.00546741	-0.0144	-0.000291012	0.0115829
83	Artibeus_lituratus	LSUMZ 37470	Paraguay, Caaguazu, Reserva Natural Privada Morombi	M	Paraguay	5.8873	-0.0139923	-0.00186049	0.0173534	-0.00563233	4.88262	0.00877253	0.00623957	-0.0142149	-0.00134579
84	Artibeus_lituratus	LSUMZ 37469	Paraguay, Caaguazu, Reserva Natural Privada Morombi	M	Paraguay	5.71667	-0.0230575	-0.00402065	0.014974	-0.0047546	4.6201	0.0182998	-0.00843172	-0.00585248	0.00561303
85	Artibeus_lituratus	LSUMZ 37481	Paraguay, Caaguazu, Reserva Natural Privada Morombi	F	Paraguay	5.80645	-0.00325501	-0.00250278	0.0236853	0.000335546	4.70051	0.0121257	-0.00454402	0.00676803	0.00237808
86	Artibeus_lituratus	LSUMZ 37482	Paraguay, Caaguazu, Reserva Natural Privada Morombi	M	Paraguay	5.71204	0.000656169	0.0177339	0.0107638	0.00512252	4.64406	0.00386731	-0.000397374	-0.0130724	0.000657281
87	Artibeus_lituratus	LSUMZ 37483	Paraguay, Caaguazu, Reserva Natural Privada Morombi	F	Paraguay	5.52785	-0.0127559	0.00558869	-0.0086309	-0.00116301	4.40913	0.0206293	-0.0129594	0.00239557	-0.0177047
88	Artibeus_lituratus	LSUMZ 37489	Paraguay, Caaguazu, Estancia Arakangy	F	Paraguay	6.07684	-0.0161991	0.0051115	-0.0168238	-0.00201834	4.7715	0.00215614	-0.0109783	0.000366766	-0.0189473
89	Artibeus_lituratus	LSUMZ 37490	Paraguay, Caaguazu, Estancia Arakangy	F	Paraguay	5.86613	0.00733112	-0.00149945	-0.0129097	-0.0151971	4.71337	0.0240538	-0.00224058	-0.0169653	-0.00697124
90	Artibeus_lituratus	LSUMZ 37491	Paraguay, Caaguazu, Estancia Arakangy	M	Paraguay	5.95848	-0.00312745	0.0145547	-0.00460585	-0.0123275	4.73003	0.00649882	-0.00243548	-0.00848226	-0.0029293
91	Artibeus_lituratus	LSUMZ 37492	Paraguay, Caaguazu, Estancia Arakangy	F	Paraguay	5.738	0.00939015	-0.0355805	-0.00741667	0.0150863	4.74107	-5.73128e-05	-0.0282218	0.0165529	-0.0109684
92	Artibeus_lituratus	LSUMZ 37493	Paraguay, Caaguazu, Estancia Arakangy	M	Paraguay	5.86362	-0.0213709	0.0140504	0.00736418	-0.00432431	4.65066	0.00297293	-0.00653852	-0.0185518	-0.00566548
93	Artibeus_lituratus	LSUMZ 37495	Paraguay, Caaguazu, Estancia Arakangy	M	Paraguay	5.74918	-0.0320343	-0.00294067	0.00956574	-0.00559168	4.6699	0.0187606	0.00808143	0.00426783	-0.0181536
94	Artibeus_lituratus	LSUMZ 17694	Peru, Depto, Huanuco, ca 35km NE Tingo Mario, Har. Sta. Elena	M	Peru	5.75985	-0.0210976	-0.0148287	-0.0117057	-0.0110332	4.68418	0.00951689	-0.0079902	-0.00401975	-0.00616131
95	Artibeus_lituratus	LSUMZ 14241	Peru, Cajamarca, 9km S Jaen	M	Peru	5.85508	-0.0397355	0.0042739	-0.00740534	0.00494653	4.54617	0.0133313	-0.0064736	0.0217015	-0.0160156
96	Artibeus_lituratus	LSUMZ 18393	Peru, Dpto Amazonas, Carretera, Corral Quemado- Nazareth	F	Peru	5.65724	-0.0170883	-0.0368771	0.0112869	-0.00579719	4.71056	0.0122385	0.0046213	0.00478957	0.0171165
97	Artibeus_lituratus	LSUMZ 18394	Peru, Dpto Amazonas, Carretera, Corral Quemado- Nazareth	F	Peru	5.95273	-0.00950115	0.00686954	0.0133853	0.00144322	4.72184	0.00647714	-0.00792663	0.0201622	0.00477297
98	Artibeus_lituratus	LSUMZ 22076	Peru, Dpto Amazonas, vicinity of Huampami, Rio Cenepa	F	Peru	5.91343	0.00163649	-0.0113834	-0.00903495	0.00895675	4.74528	-0.000738016	-0.00102023	0.00715332	0.0168328
99	Artibeus_lituratus	LSUMZ 12240	Peru, Loreto, Yarinacocha	M	Peru	5.50011	0.0185516	-0.00571285	-0.0197545	-0.00615085	4.53742	-0.00187715	-0.00267904	0.000212879	0.00461803
100	Artibeus_lituratus	LSUMZ 12241	Peru, Loreto, Yarinacocha	M	Peru	5.48084	0.0206384	0.000994315	0.021447	-0.00463343	4.52224	0.00813994	0.0141867	0.00887046	0.00113604
101	Artibeus_lituratus	LSUMZ 12242	Peru, Loreto, Yarinacocha	M	Peru	5.77509	0.0288728	0.0147133	0.0154496	0.00224265	4.68266	-0.00295314	0.00732402	-0.00182398	0.00576592
102	Artibeus_lituratus	LSUMZ 12243	Peru, Loreto, Yarinacocha	M	Peru	5.67791	-0.00857801	0.0134054	-8.36189e-06	-0.00671441	4.55036	-0.0115898	-0.00475516	0.00134708	-0.00730847
103	Artibeus_lituratus	LSUMZ 12539	Peru, Loreto, Yarinacocha	M	Peru	5.75402	-0.00597404	-0.00858397	0.00808115	0.000448825	4.67872	0.0138079	-0.00900086	-0.00119459	0.00174489
104	Artibeus_lituratus	LSUMZ 12541	Peru, Loreto, Yarinacocha	M	Peru	5.80011	-0.0239445	0.00992182	-0.00609716	-0.0129422	4.63442	-0.00131442	-0.00906658	-0.00904745	0.000399518
105	Artibeus_lituratus	LSUMZ 13758	Peru, Loreto, Yarinacocha	M	Peru	5.91529	0.0172667	0.0181723	0.00178613	-0.0128472	4.72572	0.00352608	0.012428	-0.0142246	0.00223375
106	Artibeus_lituratus	LSUMZ 14244	Peru, Loreto, Yarinacocha	M	Peru	5.61012	0.00693222	-0.00127838	0.00769998	-0.000213242	4.61631	-0.000282102	-0.0145568	-0.00103691	-0.00416173
107	Artibeus_lituratus	LSUMZ 28425	Peru, Loreto, Rio Amazonas	F	Peru	5.85818	-0.0141416	-0.0160616	-0.00226612	0.0108171	4.80881	0.0198685	0.00883145	0.00139549	0.0205323
108	Artibeus_lituratus	LSUMZ 28424	Peru, Loreto, Rio Amazonas	F	Peru	5.73297	0.00147931	-0.0266174	0.00282804	0.00317727	4.73067	0.0106433	0.0130536	-0.00177251	0.0175665
109	Artibeus_lituratus	LSUMZ 12234	Peru, Loreto, Balta	F	Peru	5.67551	0.00685501	-0.00637986	-0.00808373	-0.00948505	4.77596	-0.00599841	-0.00662151	-0.00240977	0.00486292
110	Artibeus_lituratus	LSUMZ 12237	Peru, Loreto, Balta	F	Peru	5.65662	0.0263054	0.0114112	-0.00878971	-0.0102479	4.61775	-0.0171224	-0.00888774	-0.00509194	-0.012434
111	Artibeus_lituratus	LSUMZ 12238	Peru, Loreto, Balta	F	Peru	5.66194	-0.00983356	-0.00892484	0.00490362	-0.00481964	4.61372	0.00390598	0.000607366	-0.00120222	0.0102305
112	Artibeus_lituratus	LSUMZ 28245	Peru, Loreto, Quebrada Oran, N Rio Amazonas, 85km NE Iquitos	F	Peru	5.7497	-0.0180502	0.00790704	0.00473264	-0.0144593	4.52198	0.0287694	0.0159925	-0.00724003	-0.0185848
113	Artibeus_lituratus	LSUMZ 28249	Peru, Loreto, Quebrada Oran, N Rio Amazonas, 85km NE Iquitos	F	Peru	5.58611	0.00705774	-0.0137748	-0.0131446	-0.010585	4.57746	0.000890452	-0.00456998	0.00150114	-0.000546745
Lateral View PCA Importance
	PC1	PC2	PC3	PC4	PC5	PC6	PC7	PC8	PC9	PC10
Standard deviation	0.0185181	0.0161435	0.0109885	0.00904109	0.00770184	0.00606826	0.00505959	0.00473467	0.00430537	0.00400021
Proportion of Variance	0.31726	0.24111	0.11171	0.07562	0.05488	0.03407	0.02368	0.02074	0.01715	0.0148
Cumulative Proportion	0.31726	0.55836	0.67007	0.7457	0.80058	0.83464	0.85833	0.87907	0.89622	0.91102
Ventral View PCA Importance
	PC1	PC2	PC3	PC4	PC5	PC6	PC7	PC8	PC9	PC10
Standard deviation	0.0153022	0.0110255	0.00954053	0.00923266	0.00719413	0.00638302	0.00550399	0.00532813	0.00495335	0.00455692
Proportion of Variance	0.25858	0.13424	0.10051	0.09413	0.05715	0.04499	0.03345	0.03135	0.02709	0.02293
Cumulative Proportion	0.25858	0.39282	0.49333	0.58746	0.64462	0.68961	0.72306	0.75441	0.78151	0.80444

## Sheet: Table S6-Lituratus Stats
Intraspecific statistical analyses for A. lituratus. Results for lateral and ventral view Procrustes ANOVAs of shape, sex, size, and country with pairwise comparisons. Distance matrices for country means, and the cophenetic coefficients for lateral and ventral datasets are also included.
Artibeus lituratus ANOVAs
Shape (Lateral View) ~ Sex + log10(Centroid Size) + Country
	Df	SS	MS	Rsq	F	Z	Pr(>F)
Sex	1	0.00319606	0.00319606	0.0264012	3.8177	2.64248	0.002
Size	1	0.00544763	0.00544763	0.0450004	6.5072	3.65082	0.001
Country	7	0.0261853	0.00374076	0.216305	4.46834	6.91104	0.001
Residuals	103	0.0862285	0.00083717	0.712294
Total	112	0.121057
Pairwise Comparisons (Lateral View)–– Effect sizes (Z) below diagonal, p-values above diagonal
	Argentina	Belize	Costa Rica	Mexico, Colima	Mexico, Tabasco	Paraguay	Peru	Trinidad
Argentina	1	0.001	0.001	0.001	0.001	0.001	0.001	0.001
Belize	6.10283	1	0.257	0.044	0.039	0.064	0.035	0.535
Costa Rica	6.50875	0.548077	1	0.569	0.079	0.006	0.033	0.037
Mexico, Colima	4.72944	1.97742	-0.276251	1	0.013	0.002	0.013	0.011
Mexico, Tabasco	5.50242	2.0397	1.49312	2.68632	1	0.116	0.595	0.037
Paraguay	7.69431	1.7257	3.56332	3.73236	1.22285	1	0.041	0.189
Peru	5.49859	2.07894	2.06988	2.63005	-0.373945	1.986	1	0.016
Trinidad	7.78037	-0.249249	2.0881	3.05409	2.00768	0.784085	2.67804	1
Shape (Ventral View) ~ Sex + log10(Centroid Size) + Country
	Df	SS	MS	Rsq	F	Z	Pr(>F)
Sex	1	0.000776847	0.000776847	0.00765963	1.00536	0.233939	0.39
Size	1	0.00687524	0.00687524	0.0677892	8.89765	5.08598	0.001
Country	7	0.0141805	0.00202578	0.139818	2.62168	5.85048	0.001
Residuals	103	0.0795884	0.000772703	0.784733
Total	112	0.101421
Pairwise Comparisons (Ventral View)–– Effect sizes (Z) below diagonal, p-values above diagonal
	Argentina	Belize	Costa Rica	Mexico, Colima	Mexico, Tabasco	Paraguay	Peru	Trinidad
Argentina	1	0.001	0.001	0.001	0.001	0.096	0.088	0.19
Belize	4.72033	1	0.283	0.791	0.157	0.001	0.006	0.045
Costa Rica	5.55094	0.456651	1	0.164	0.269	0.001	0.002	0.108
Mexico, Colima	7.27872	-0.793326	0.968461	1	0.084	0.001	0.001	0.014
Mexico, Tabasco	4.96032	0.91684	0.571457	1.48862	1	0.001	0.019	0.417
Paraguay	1.43364	5.42782	6.97019	7.57621	6.93603	1	0.004	0.035
Peru	1.47913	3.48433	3.9131	5.01086	2.48966	3.04348	1	0.472
Trinidad	0.828581	1.92948	1.36366	2.67634	0.0657866	1.99559	-0.0822675	1
Distance Matrices Between Country Means
Lateral view above diagonal, ventral view below diagonal
	Argentina	Belize	Costa Rica	Mexico, Colima	Mexico, Tabasco	Paraguay	Peru	Trinidad
Argentina	-	0.0298741	0.0177799	0.0177706	0.0165197	0.0186113	0.0303616	0.0220168
Belize	0.0270883	-	0.0223451	0.0212759	0.0245868	0.0269528	0.0221587	0.0203349
Costa Rica	0.0242919	0.0187598	-	0.0129959	0.0160534	0.0187678	0.0216601	0.0154704
Mexico, Colima	0.0216899	0.0197538	0.0151539	-	0.0143529	0.0163247	0.0277836	0.0165715
Mexico, Tabasco	0.0215951	0.0197218	0.0130016	0.0150479	-	0.0182716	0.0317337	0.0125827
Paraguay	0.0307603	0.0174056	0.0167872	0.0178261	0.0192639	-	0.0307543	0.0242039
Peru	0.0270835	0.020779	0.0231864	0.0245703	0.0258891	0.0226445	-	0.0275104
Trinidad	0.0212476	0.0210519	0.0180241	0.0193764	0.0183928	0.0251241	0.0269299	-
	Cophenetic Coefficient
Lateral View	0.850438
Ventral View	0.830133
	AvgCSLat	AvgCSVent
Argentina	5.67597	4.61056
Belize	5.26681	4.23979
Trinidad	5.72243	4.64429
Costa Rica	5.54468	4.47597
Mexico, Colima	5.33224	4.32992
Mexico, Tabasco	5.5496	4.52723
Paraguay	5.78167	4.68778
Peru	5.72864	4.65011
log10(Centroid Size–Lateral View) ~ Country + Sex –– Evaluating size dimorphism
	df	SS	MS	F	p
Country	7	0.015173	0.0021675	16.653	0.001
Sex	1	0.000656	0.0006558	5.038	0.0269
Residuals	104	0.013537	0.0001302
log10(Centroid Size–Lateral View) ~ Country + Sex –– Evaluating size dimorphism
	df	SS	MS	F	p
Country	7	0.016257	0.0023224	14.914	0.001
Sex	1	0.000552	0.0005519	3.544	0.0625
Residuals	104	0.016195	0.0001557
